# Supplementary material for: Synthesis and characterisation of group 11 metal complexes with a guanidine-tagged triphenylphosphine and evaluation of the isolated Au(i) complexes in gold-mediated organic reactions
Source: Royal Society of Chemistry journal article supplement (doi:10.1039/d3nj00451a), 2023-01-01
Supplement: d3nj00451a1.pdf [file d3nj00451a1.pdf]

## Supporting Information

for

### **Synthesis and characterisation of Group 11 metal complexes with a guanidine-tagged triphenylphosphine and evaluation of the isolated Au(I) complexes in gold-mediated organic reactions**

Zdeněk Leitner, Ivana Císařová and Petr Štěpnička\*

*Department of Inorganic Chemistry, Faculty of Science, Charles University,  
Hlavova 2030, 128 40 Prague, Czech Republic*

#### **Contents**

|                           |      |
|---------------------------|------|
| X-ray crystallography     | S-2  |
| Copies of the NMR spectra | S-13 |

## X-ray crystallography

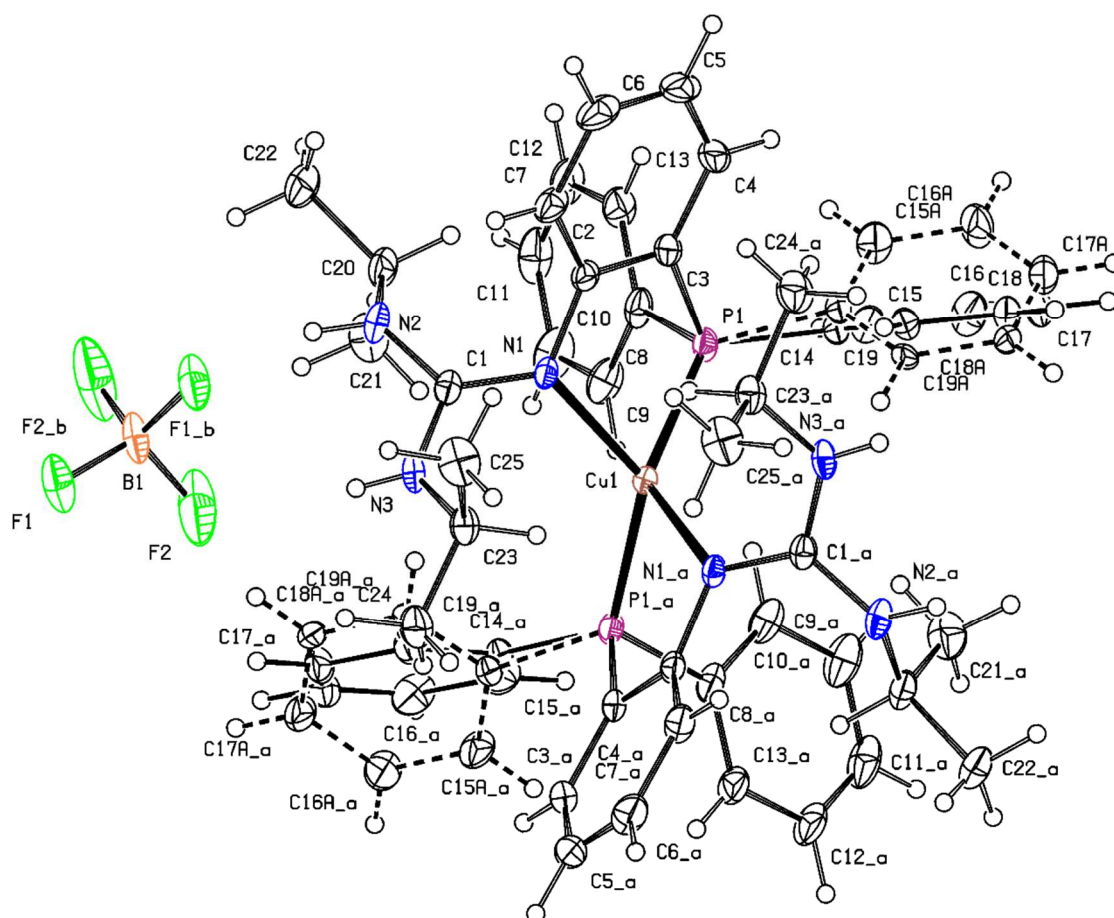

**Figure S1** PLATON plot of the structure of **2a**·C<sub>2</sub>H<sub>4</sub>Cl<sub>2</sub> with displacement ellipsoids at the 30% probability level (symmetry operations:  $a = 1-x, y, 1-z$ ;  $b = 2-x, y, 2-z$ )

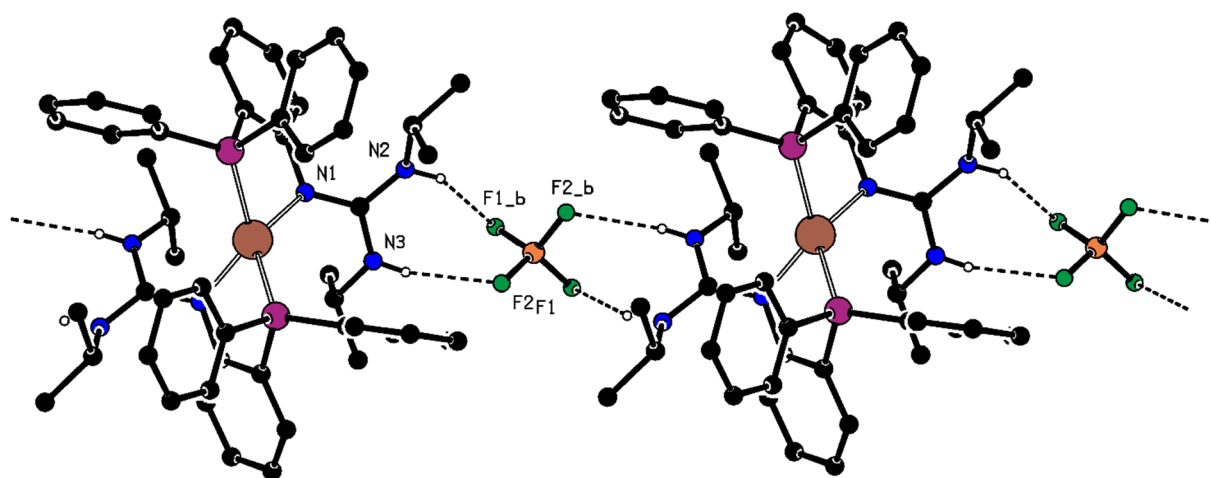

**Figure S2** Simplified packing diagram for **2a**·C<sub>2</sub>H<sub>4</sub>Cl<sub>2</sub> showing the N-H...F hydrogen bonds (N2...F1 = 3.043(4) Å, N3...F2 = 3.024(5) Å; the chains propagate along the [1 0 1] direction)

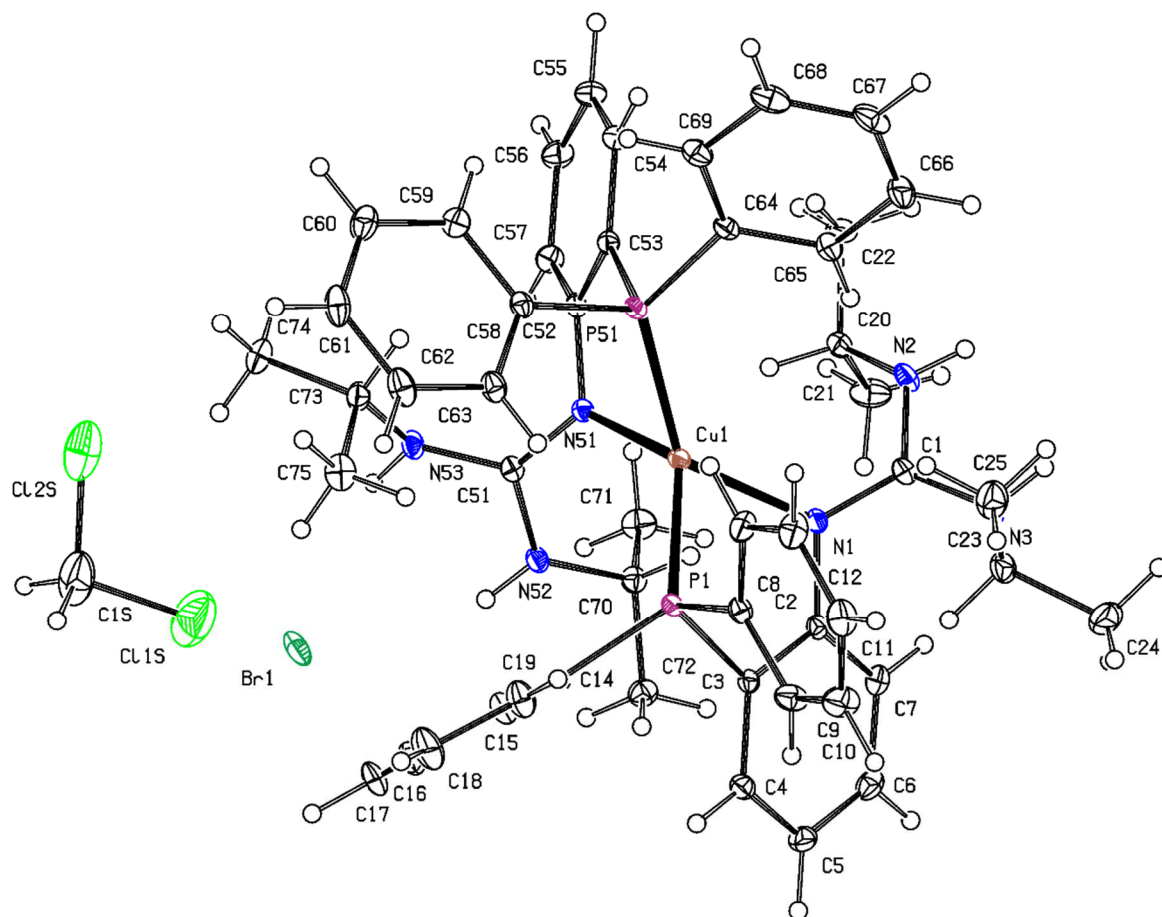

**Figure S3** PLATON plot of the structure of **2b**·CH<sub>2</sub>Cl<sub>2</sub> showing displacement ellipsoids at the 30% probability level

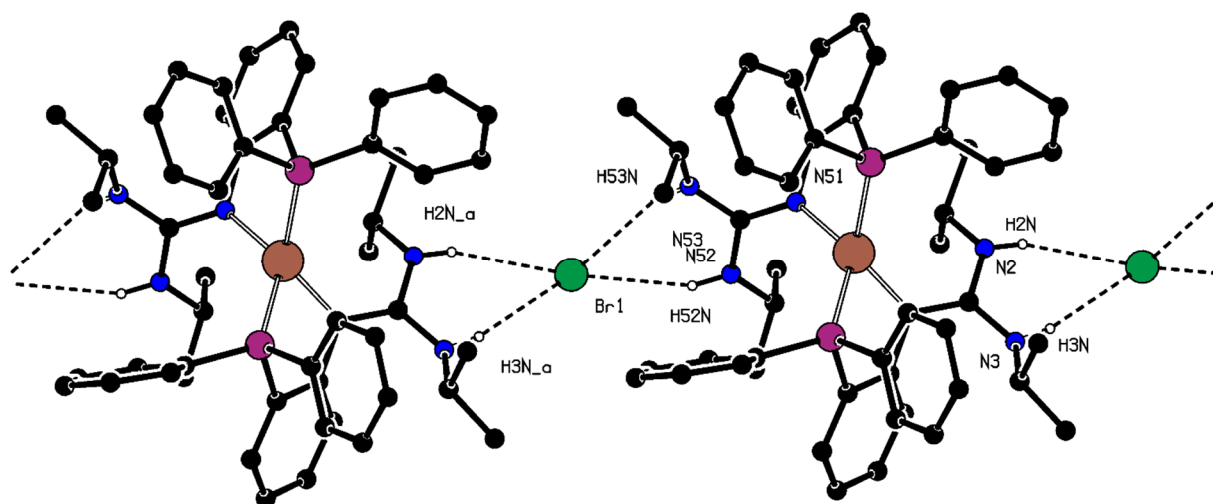

**Figure S4** Simplified packing diagram for **2b**·CH<sub>2</sub>Cl<sub>2</sub> illustrating the cooperative N–H···Br hydrogen bonds (N2···Br1 = 3.525(2) Å, N3···Br1 = 3.460(2) Å; N52···Br1 = 3.527(2) Å, and N53···Br1 = 3.420(2) Å)

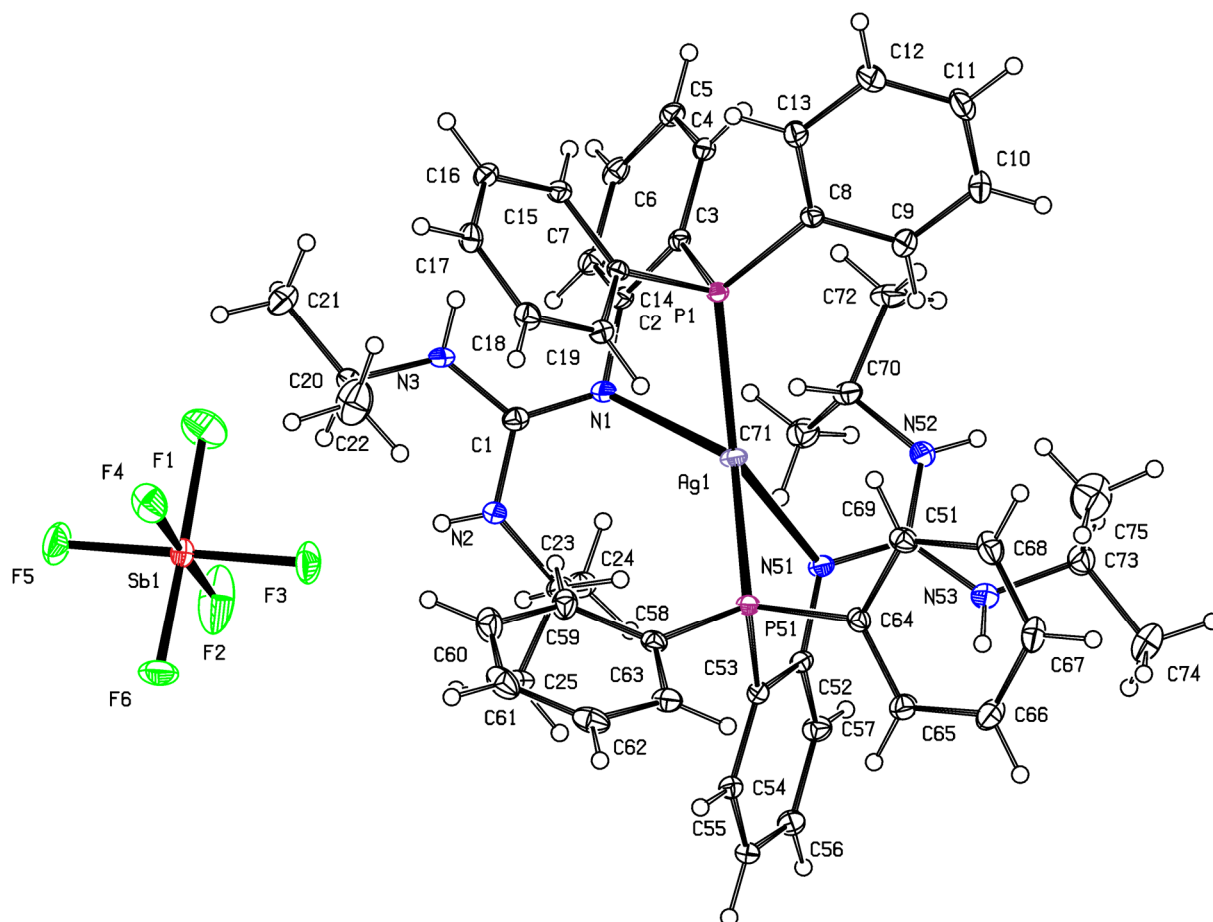

**Figure S5** PLATON plot of **3a** with displacement ellipsoids at the 30% probability level

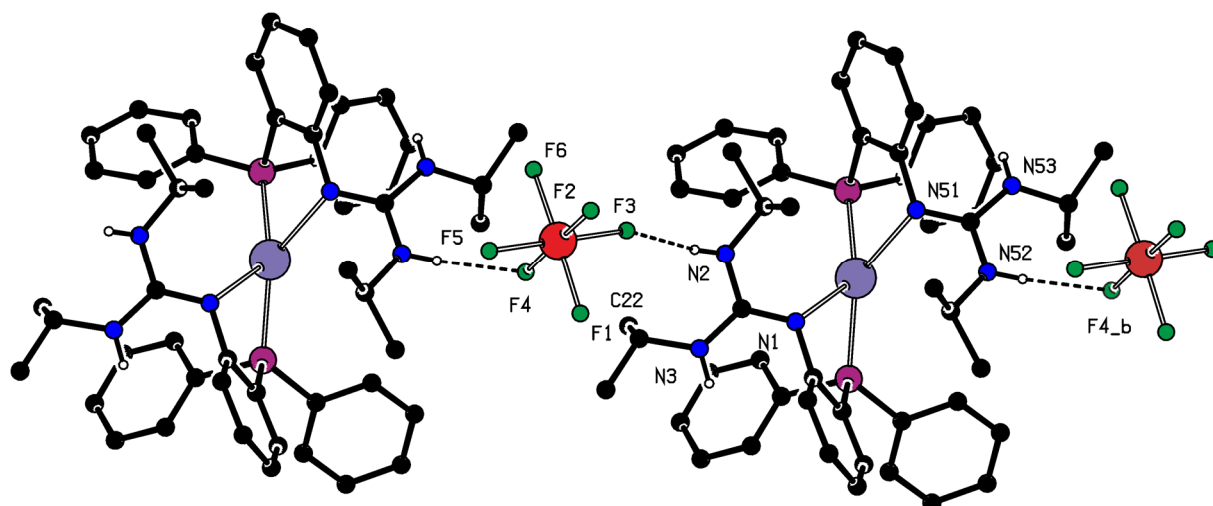

**Figure S6** Simplified packing diagram for **3a** ( $N2 \cdots F3 = 3.089(3) \text{ \AA}$ ,  $N52 \cdots F4 = 3.106(3) \text{ \AA}$ ; the chains are oriented along the crystallographic *b* axis)

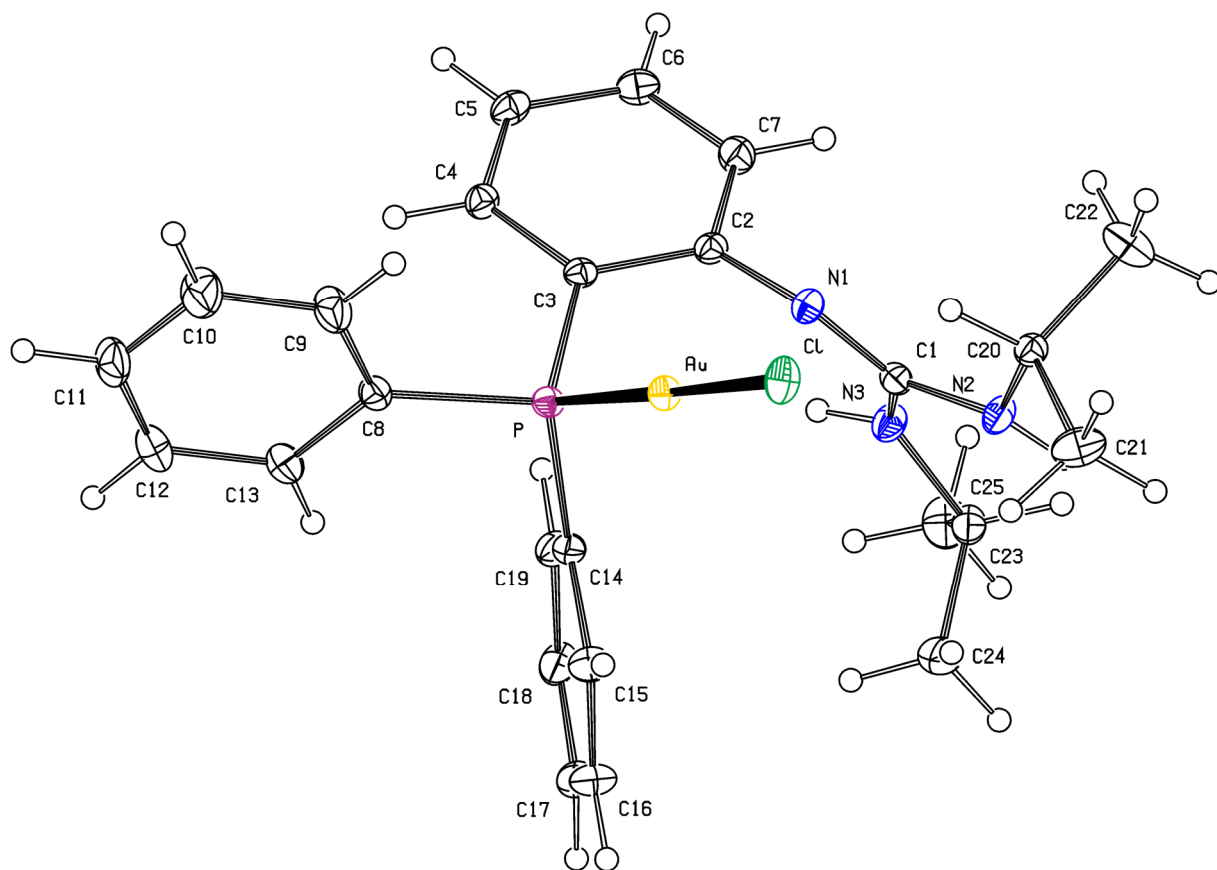

**Figure S7** PLATON plot of **4** with displacement ellipsoids at 30% probability level

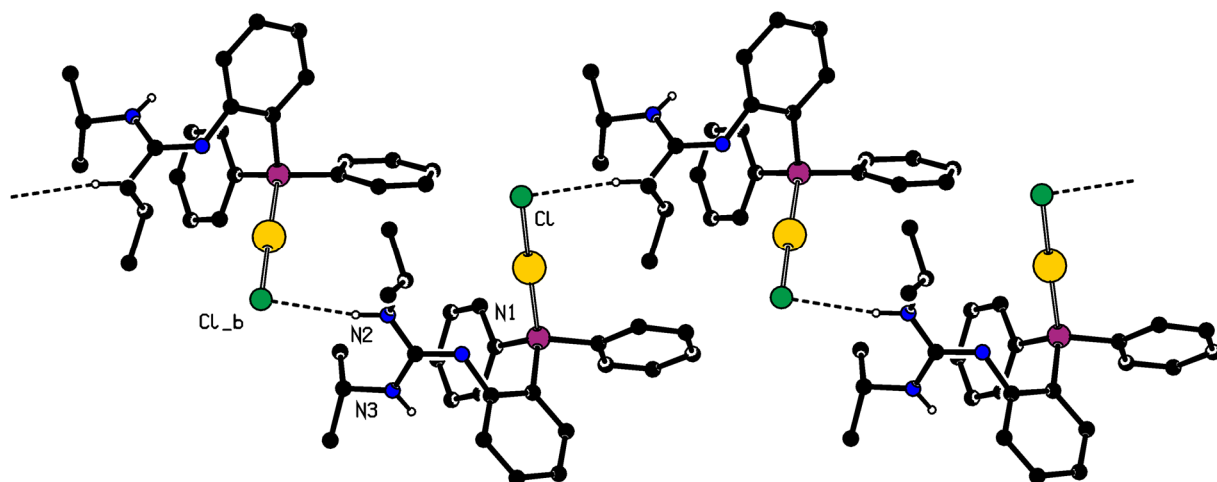

**Figure S8** Section of the infinite hydrogen-bonded chains in the structure of **4** ( $N2 \cdots Cl = 3.487(1)$  Å; the chains are oriented parallel to the crystallographic *c* axis)

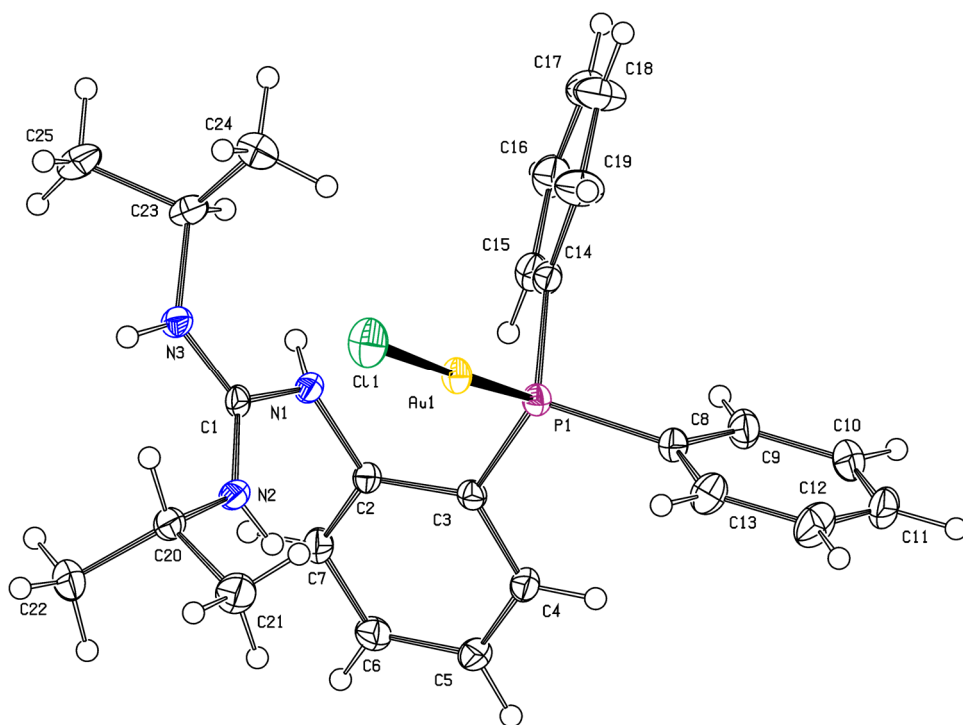

**Figure S9** PLATON plot of the complex molecule in the structure  $7\mathbf{a}\cdot\text{H}_2\text{O}\cdot\text{CH}_2\text{Cl}_2$  showing displacement ellipsoids at the 30% probability level

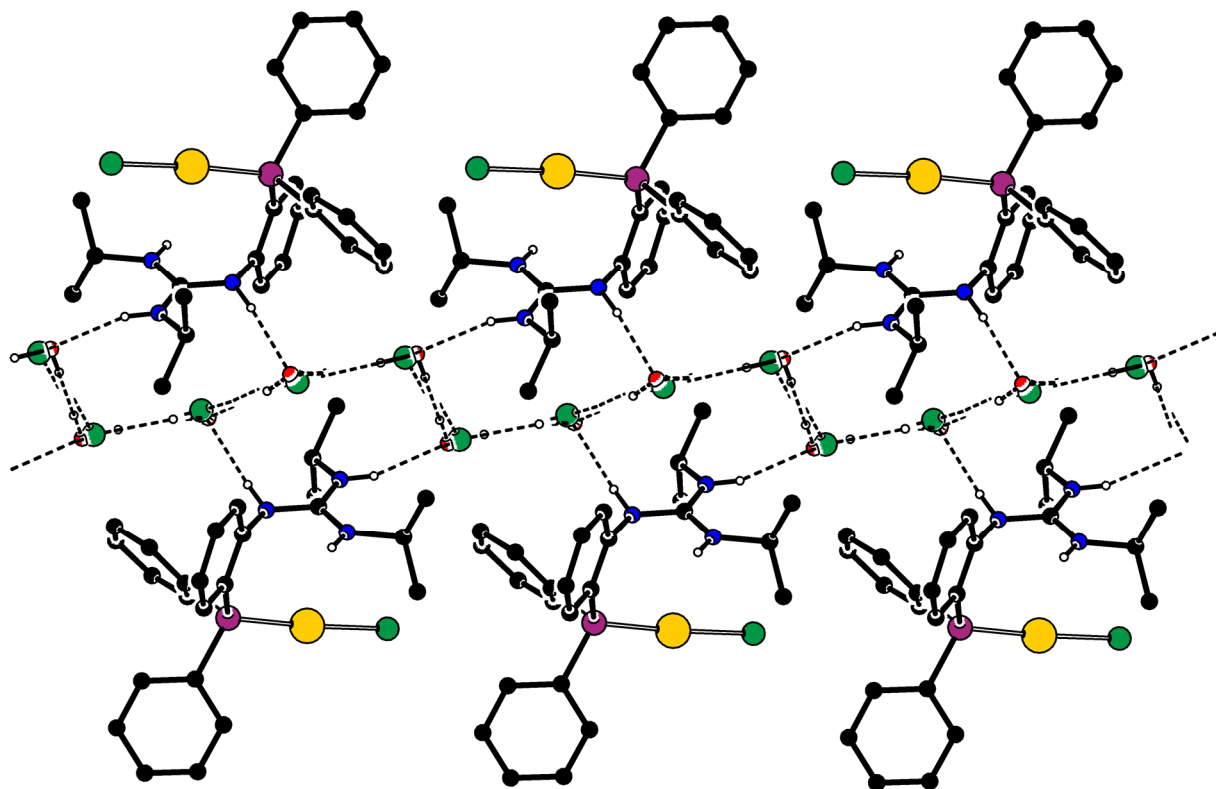

**Figure S10** Section of the hydrogen-bonded ribbon in the structure of  $7\mathbf{a}\cdot\text{H}_2\text{O}\cdot\text{CH}_2\text{Cl}_2$ . Note that the water molecules and chloride anions, interconnected by  $\text{HO}-\text{H}\cdots\text{Cl}$  hydrogen bonds into a chain in the centre, are alternating in their positions (50:50).

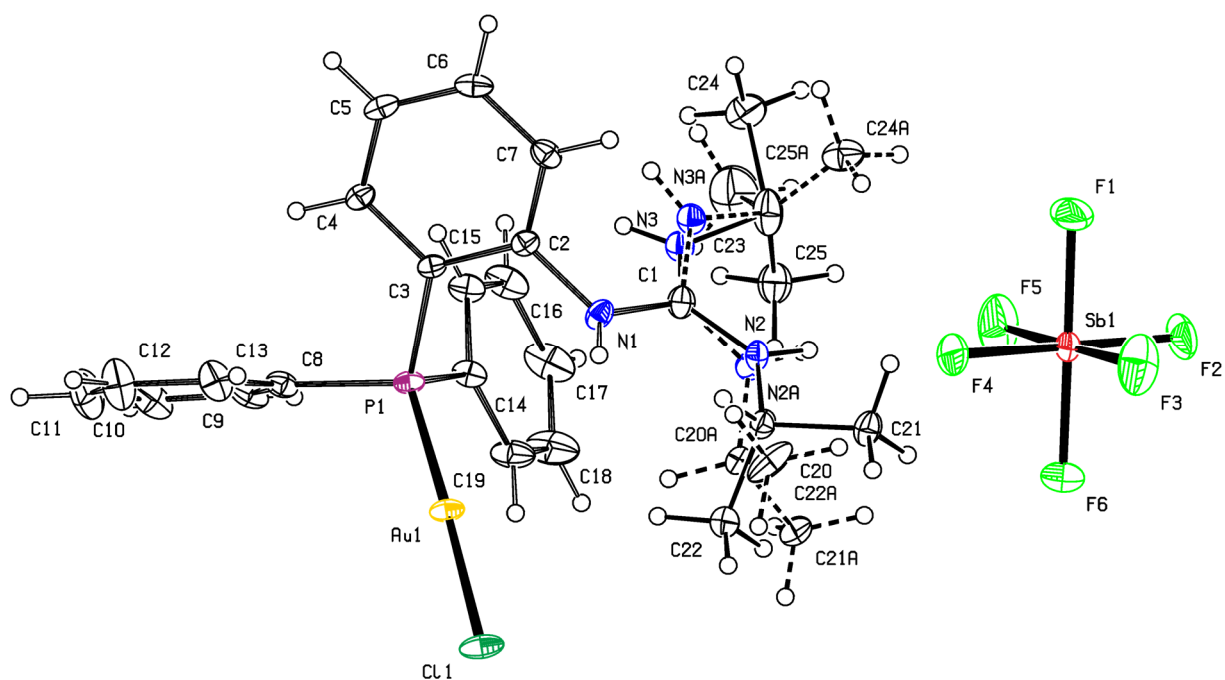

**Figure S11** PLATON plot of the molecular structure of  $7b \cdot \frac{1}{2}C_2H_4Cl_2$  with displacement ellipsoids at the 30% probability level

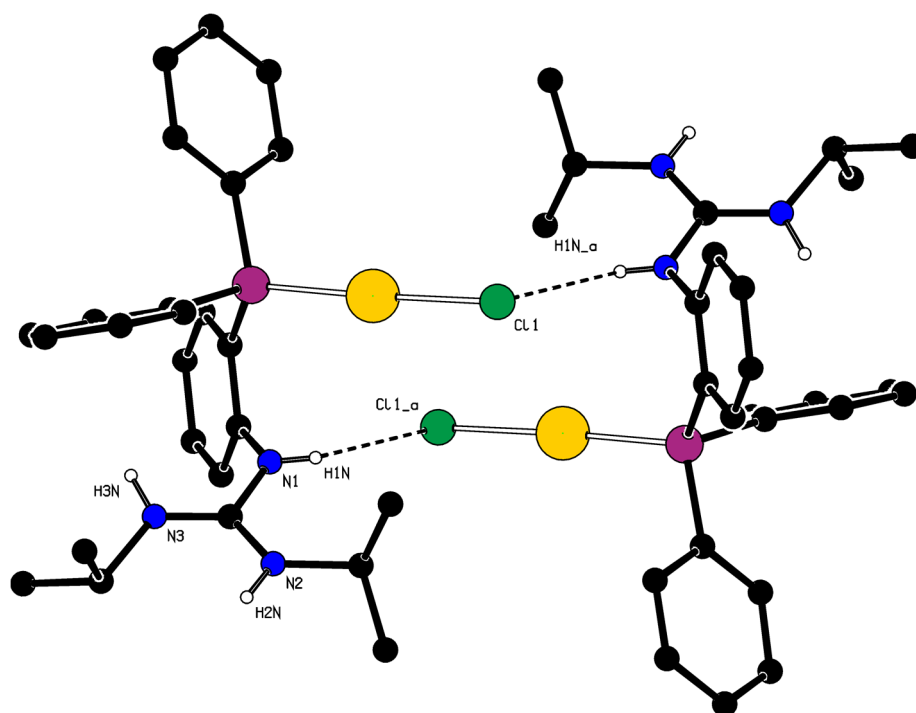

**Figure S12** Simplified packing diagram for  $7b \cdot \frac{1}{2}C_2H_4Cl_2$  ( $N1 \cdots Cl1 = 3.221(3) \text{ \AA}$ ;  $a = 2-x, 1-y, 2-z$ ; additional contacts are seen between the guanidine NH and the  $[SbF_6]^-$  anion)

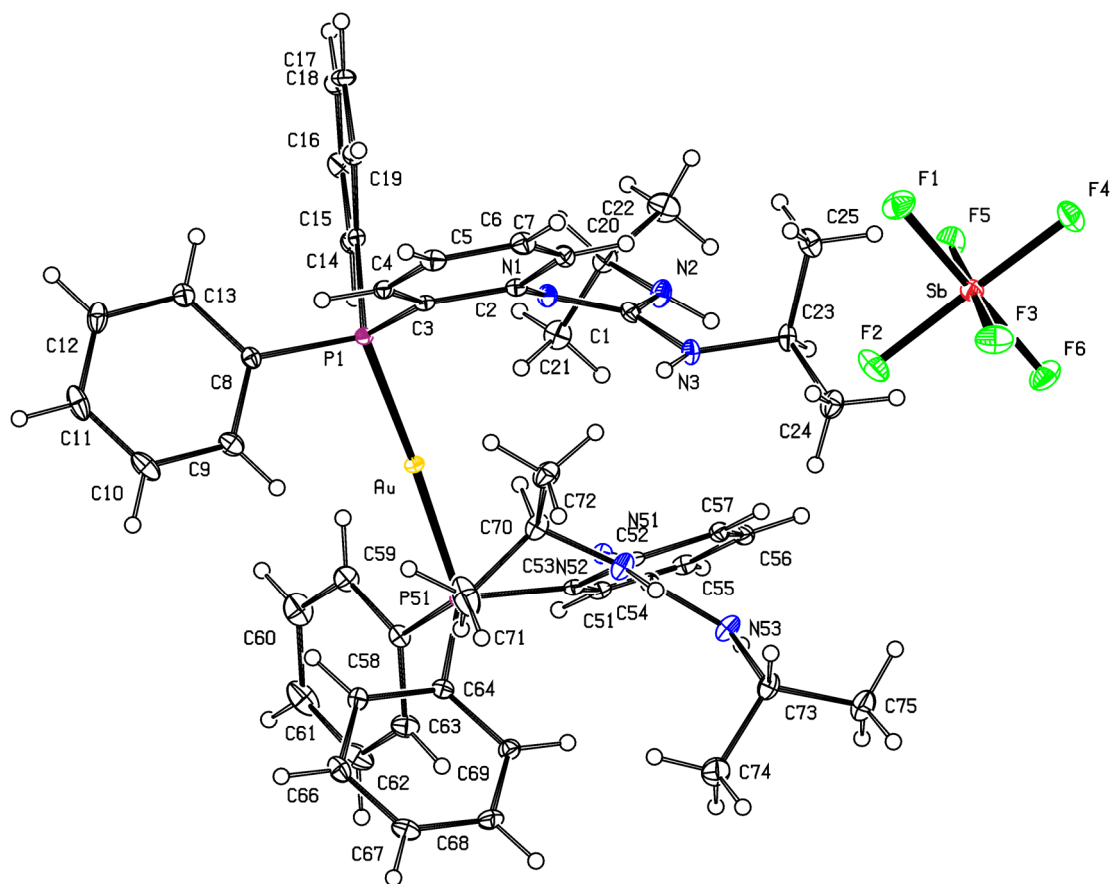

**Figure S13** PLATON plot of the structure of compound **5** with displacement ellipsoids at the 30% probability level

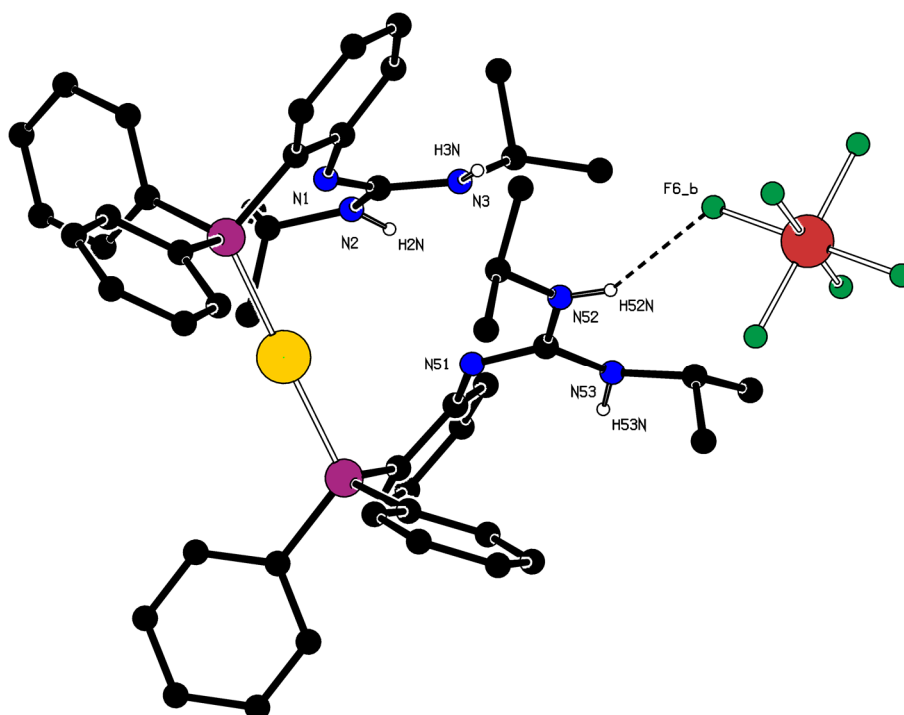

**Figure S14** Simplified diagram showing the N–H⋯F hydrogen bonds in the structure of **5** (N52⋯F6 = 3.253(2) Å,  $b = \frac{1}{2}-x, \frac{1}{2}+y, \frac{1}{2}-z$ )



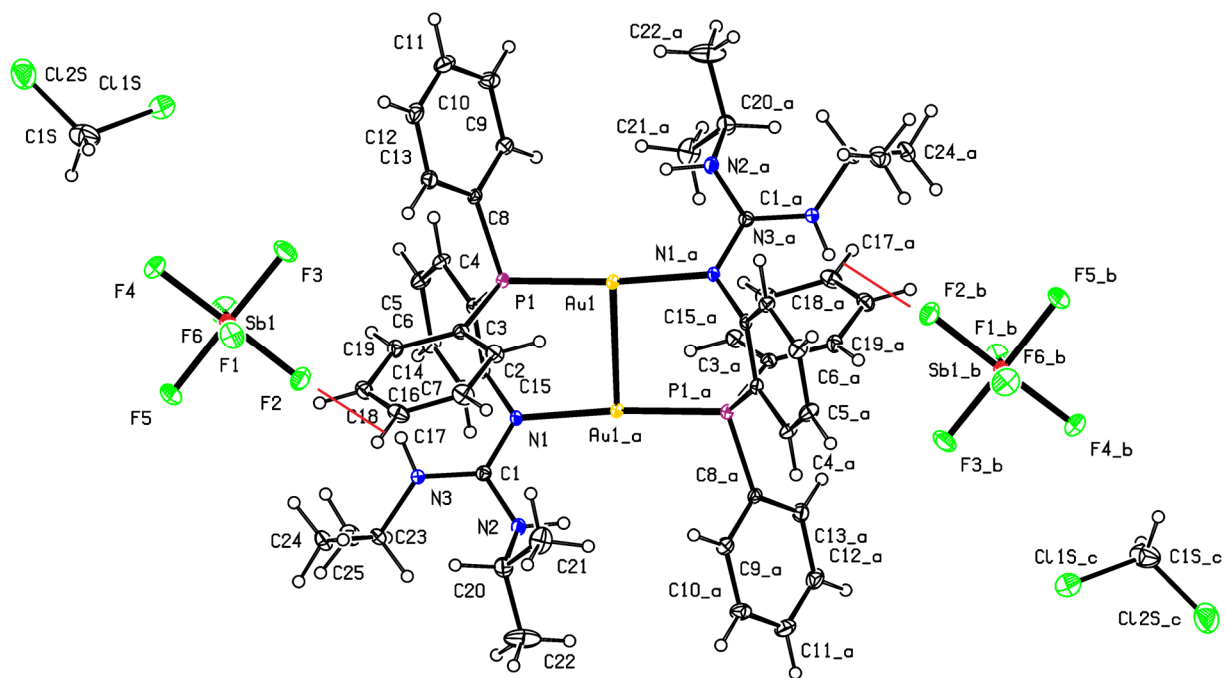

**Figure S15** PLATON plot of the structure of  $6 \cdot 2\text{CH}_2\text{Cl}_2$  with displacement ellipsoids at 30% probability level. The N–H···F hydrogen bond is indicated by red lines ( $\text{N3} \cdots \text{F2} = 3.143(3) \text{ \AA}$ ).

**Table S1.** Selected crystallographic data and structure refinement parameters.<sup>a</sup>

| Compound                                       | <b>2a</b> ·C <sub>2</sub> H <sub>4</sub> Cl <sub>2</sub>                                        | <b>2b</b> ·CH <sub>2</sub> Cl <sub>2</sub>                                        | <b>3a</b>                                                                         |
|------------------------------------------------|-------------------------------------------------------------------------------------------------|-----------------------------------------------------------------------------------|-----------------------------------------------------------------------------------|
| Formula                                        | C <sub>52</sub> H <sub>64</sub> BCl <sub>2</sub> CuF <sub>4</sub> N <sub>6</sub> P <sub>2</sub> | C <sub>51</sub> H <sub>62</sub> BrCl <sub>2</sub> CuN <sub>6</sub> P <sub>2</sub> | C <sub>50</sub> H <sub>60</sub> AgF <sub>6</sub> N <sub>6</sub> P <sub>2</sub> Sb |
| <i>M</i>                                       | 1056.28                                                                                         | 1035.35                                                                           | 1150.60                                                                           |
| Crystal system                                 | monoclinic                                                                                      | monoclinic                                                                        | monoclinic                                                                        |
| Space group                                    | <i>C2</i> (no. 5)                                                                               | <i>Cc</i> (no. 9)                                                                 | <i>P2</i> <sub>1</sub> / <i>c</i> (no. 14)                                        |
| <i>T</i> [K]                                   | 120(2)                                                                                          | 120(2)                                                                            | 120(2)                                                                            |
| <i>a</i> [Å]                                   | 11.4909(6)                                                                                      | 11.3528(5)                                                                        | 9.0246(3)                                                                         |
| <i>b</i> [Å]                                   | 20.768(1)                                                                                       | 22.421(1)                                                                         | 13.8102(4)                                                                        |
| <i>c</i> [Å]                                   | 12.5771(7)                                                                                      | 20.7154(8)                                                                        | 41.589(1)                                                                         |
| $\alpha$ [°]                                   | 90                                                                                              | 90                                                                                | 90                                                                                |
| $\beta$ [°]                                    | 115.248(2)                                                                                      | 101.490(2)                                                                        | 94.617(1)                                                                         |
| $\gamma$ [°]                                   | 90                                                                                              | 90                                                                                | 90                                                                                |
| <i>V</i> [Å <sup>3</sup> ]                     | 2714.7(3)                                                                                       | 5167.3(4)                                                                         | 5166.4(3)                                                                         |
| <i>Z</i>                                       | 2                                                                                               | 4                                                                                 | 4                                                                                 |
| $\mu$ (Mo K $\alpha$ ) [mm <sup>-1</sup> ]     | 0.613                                                                                           | 1.401                                                                             | 1.025                                                                             |
| Diffns collected                               | 62555                                                                                           | 92033                                                                             | 76434                                                                             |
| Independent diffns                             | 6241                                                                                            | 15051                                                                             | 11855                                                                             |
| Observed <sup>a</sup> diffns                   | 6219                                                                                            | 14486                                                                             | 11298                                                                             |
| <i>R</i> <sub>int</sub> <sup>b</sup> [%]       | 2.40                                                                                            | 3.40                                                                              | 2.28                                                                              |
| No. of parameters                              | 321                                                                                             | 577                                                                               | 603                                                                               |
| <i>R</i> <sup>b</sup> obsd diffns [%]          | 3.12                                                                                            | 2.59                                                                              | 3.72                                                                              |
| <i>R</i> , <i>wR</i> <sup>b</sup> all data [%] | 3.14, 7.95                                                                                      | 2.82, 6.01                                                                        | 3.94, 7.35                                                                        |
| $\Delta\rho$ [e Å <sup>-3</sup> ]              | 0.51, -0.30                                                                                     | 0.55, -0.54                                                                       | 1.69, -1.24                                                                       |

<sup>a</sup> Diffractions with  $I > 2\sigma(I)$ . <sup>b</sup> Definitions:  $R_{\text{int}} = \Sigma |F_o^2 - F_o^2(\text{mean})| / \Sigma F_o^2$ , where  $F_o^2(\text{mean})$  is the average intensity of symmetry-equivalent diffractions.  $R = \Sigma ||F_o| - |F_c|| / \Sigma |F_o|$ , and  $wR = [\Sigma \{w(F_o^2 - F_c^2)^2\} / \Sigma w(F_o^2)^2]^{1/2}$ .

**Table S1 continued**

| Compound                                       | <b>4</b>                                             | <b>7a</b> ·H <sub>2</sub> O·CH <sub>2</sub> Cl <sub>2</sub>         | <b>7b</b> ·½C <sub>2</sub> H <sub>4</sub> Cl <sub>2</sub>                           |
|------------------------------------------------|------------------------------------------------------|---------------------------------------------------------------------|-------------------------------------------------------------------------------------|
| Formula                                        | C <sub>25</sub> H <sub>30</sub> AuClN <sub>3</sub> P | C <sub>26</sub> H <sub>35</sub> AuCl <sub>4</sub> N <sub>3</sub> OP | C <sub>26</sub> H <sub>32</sub> AuCl <sub>2</sub> F <sub>6</sub> N <sub>3</sub> PSb |
| <i>M</i>                                       | 635.90                                               | 775.30                                                              | 921.13                                                                              |
| Crystal system                                 | monoclinic                                           | triclinic                                                           | triclinic                                                                           |
| Space group                                    | <i>P</i> 2 <sub>1</sub> / <i>c</i> (no. 14)          | <i>P</i> -1 (no. 2)                                                 | <i>P</i> -1 (no. 2)                                                                 |
| <i>T</i> [K]                                   | 150(2)                                               | 150(2)                                                              | 120(2)                                                                              |
| <i>a</i> [Å]                                   | 8.9997(3)                                            | 8.5896(3)                                                           | 9.8737(3)                                                                           |
| <i>b</i> [Å]                                   | 20.4818(7)                                           | 9.5972(3)                                                           | 11.1820(3)                                                                          |
| <i>c</i> [Å]                                   | 14.2314(4)                                           | 19.1254(5)                                                          | 15.0194(5)                                                                          |
| α [°]                                          | 90                                                   | 85.717(1)                                                           | 75.100(1)                                                                           |
| β [°]                                          | 107.334(1)                                           | 81.756(1)                                                           | 86.198(1)                                                                           |
| γ [°]                                          | 90                                                   | 84.901(1)                                                           | 85.197(1)                                                                           |
| <i>V</i> [Å <sup>3</sup> ]                     | 2504.1(1)                                            | 1551.09(8)                                                          | 1595.15(8)                                                                          |
| <i>Z</i>                                       | 4                                                    | 2                                                                   | 2                                                                                   |
| μ(Mo Kα) [mm <sup>-1</sup> ]                   | 6.062                                                | 5.162                                                               | 5.714                                                                               |
| Diffns collected                               | 72057                                                | 29187                                                               | 32034                                                                               |
| Independent diffns                             | 5764                                                 | 7106                                                                | 7286                                                                                |
| Observed <sup>a</sup> diffns                   | 5601                                                 | 6974                                                                | 6966                                                                                |
| <i>R</i> <sub>int</sub> <sup>b</sup> [%]       | 2.37                                                 | 2.27                                                                | 1.90                                                                                |
| No. of parameters                              | 284                                                  | 309                                                                 | 410                                                                                 |
| <i>R</i> <sup>b</sup> obsd diffns [%]          | 1.11                                                 | 1.93                                                                | 2.27                                                                                |
| <i>R</i> , <i>wR</i> <sup>b</sup> all data [%] | 1.17, 2.71                                           | 1.98, 4.72                                                          | 2.42, 5.19                                                                          |
| Δρ [e Å <sup>-3</sup> ]                        | 0.42, -0.42                                          | 1.06, -1.22                                                         | 1.66, -1.77                                                                         |

**Table S1 continued**

| Compound                                       | <b>5</b>                                                                          | <b>6·2CH<sub>2</sub>Cl<sub>2</sub></b>                                                                                        |
|------------------------------------------------|-----------------------------------------------------------------------------------|-------------------------------------------------------------------------------------------------------------------------------|
| Formula                                        | C <sub>50</sub> H <sub>60</sub> AuF <sub>6</sub> N <sub>6</sub> P <sub>2</sub> Sb | C <sub>52</sub> H <sub>64</sub> Au <sub>2</sub> Cl <sub>4</sub> F <sub>12</sub> N <sub>6</sub> P <sub>2</sub> Sb <sub>2</sub> |
| <i>M</i>                                       | 1239.69                                                                           | 1842.26                                                                                                                       |
| Crystal system                                 | monoclinic                                                                        | monoclinic                                                                                                                    |
| Space group                                    | <i>P2<sub>1</sub>/n</i> (no. 14)                                                  | <i>P2<sub>1</sub>/n</i> (no. 14)                                                                                              |
| <i>T</i> [K]                                   | 120(2)                                                                            | 120(2)                                                                                                                        |
| <i>a</i> [Å]                                   | 11.2205(2)                                                                        | 8.1541(4)                                                                                                                     |
| <i>b</i> [Å]                                   | 20.5943(4)                                                                        | 16.2447(8)                                                                                                                    |
| <i>c</i> [Å]                                   | 21.9857(5)                                                                        | 23.836(2)                                                                                                                     |
| $\alpha$ [°]                                   | 90                                                                                | 90                                                                                                                            |
| $\beta$ [°]                                    | 91.710(1)                                                                         | 97.106(2)                                                                                                                     |
| $\gamma$ [°]                                   | 90                                                                                | 90                                                                                                                            |
| <i>V</i> [Å <sup>3</sup> ]                     | 5078.2(2)                                                                         | 3133.1(3)                                                                                                                     |
| <i>Z</i>                                       | 4                                                                                 | 2                                                                                                                             |
| $\mu$ (Mo K $\alpha$ ) [mm <sup>-1</sup> ]     | 3.543                                                                             | 5.818                                                                                                                         |
| Diffns collected                               | 54360                                                                             | 38524                                                                                                                         |
| Independent diffns                             | 11660                                                                             | 7172                                                                                                                          |
| Observed <sup>a</sup> diffns                   | 10688                                                                             | 6751                                                                                                                          |
| <i>R</i> <sub>int</sub> <sup>b</sup> [%]       | 2.91                                                                              | 2.41                                                                                                                          |
| No. of parameters                              | 603                                                                               | 365                                                                                                                           |
| <i>R</i> <sup>b</sup> obsd diffns [%]          | 1.81                                                                              | 1.91                                                                                                                          |
| <i>R</i> , <i>wR</i> <sup>b</sup> all data [%] | 2.20, 3.76                                                                        | 2.10, 4.39                                                                                                                    |
| $\Delta\rho$ [e Å <sup>-3</sup> ]              | 0.45, -0.40                                                                       | 1.16, -0.77                                                                                                                   |

## Copies of the NMR spectra

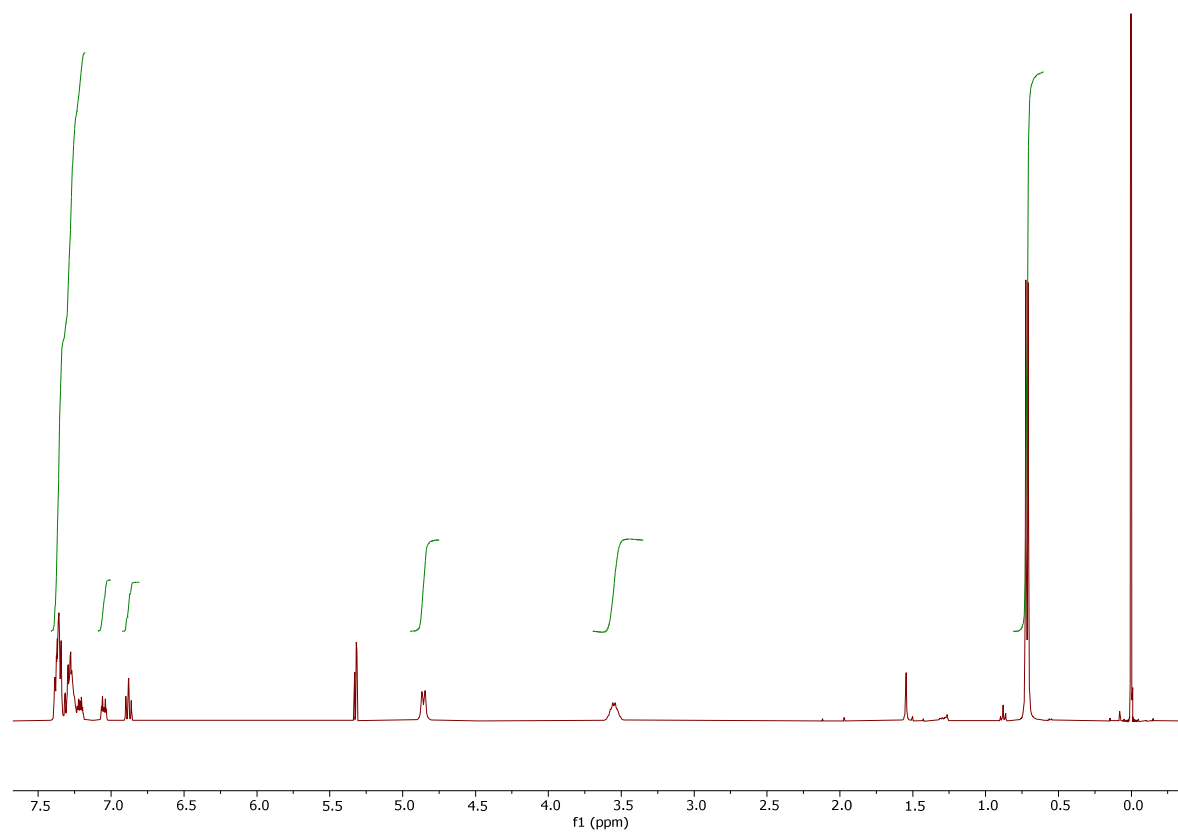

**Figure S16**  $^1\text{H}$  NMR spectrum ( $\text{CD}_2\text{Cl}_2$ , 400 MHz) of **2a**

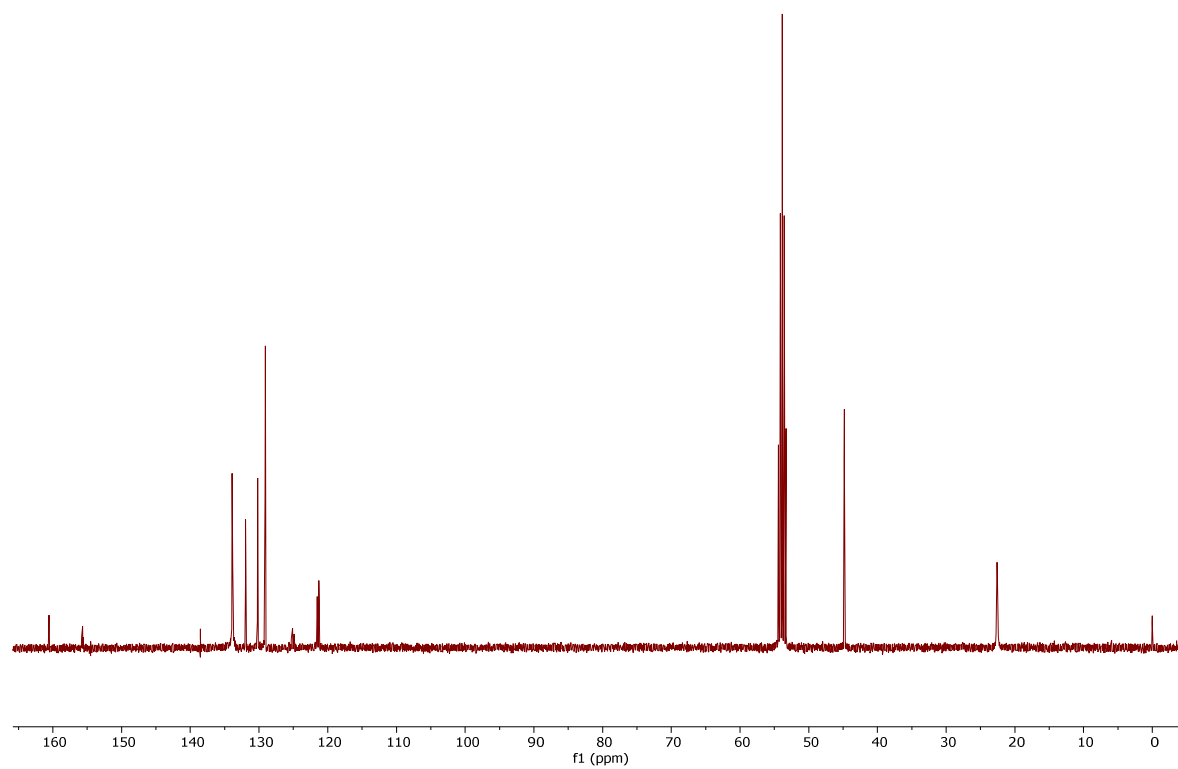

**Figure S17**  $^{13}\text{C}\{^1\text{H}\}$  NMR spectrum ( $\text{CD}_2\text{Cl}_2$ , 101 MHz) of **2a**

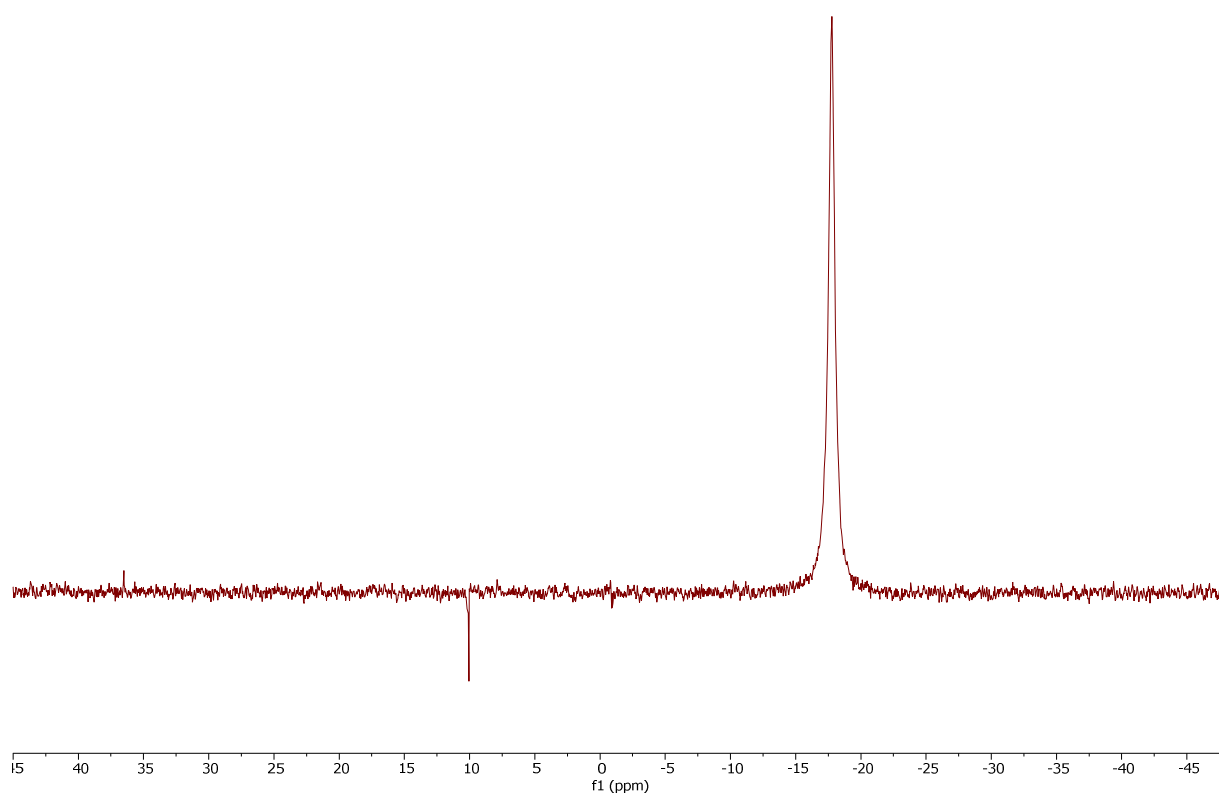

**Figure S18**  $^{31}\text{P}\{^1\text{H}\}$  NMR spectrum ( $\text{CD}_2\text{Cl}_2$ , 162 MHz) of **2a** (the “signal” at  $\delta_{\text{P}} \approx 10$  is a spike)

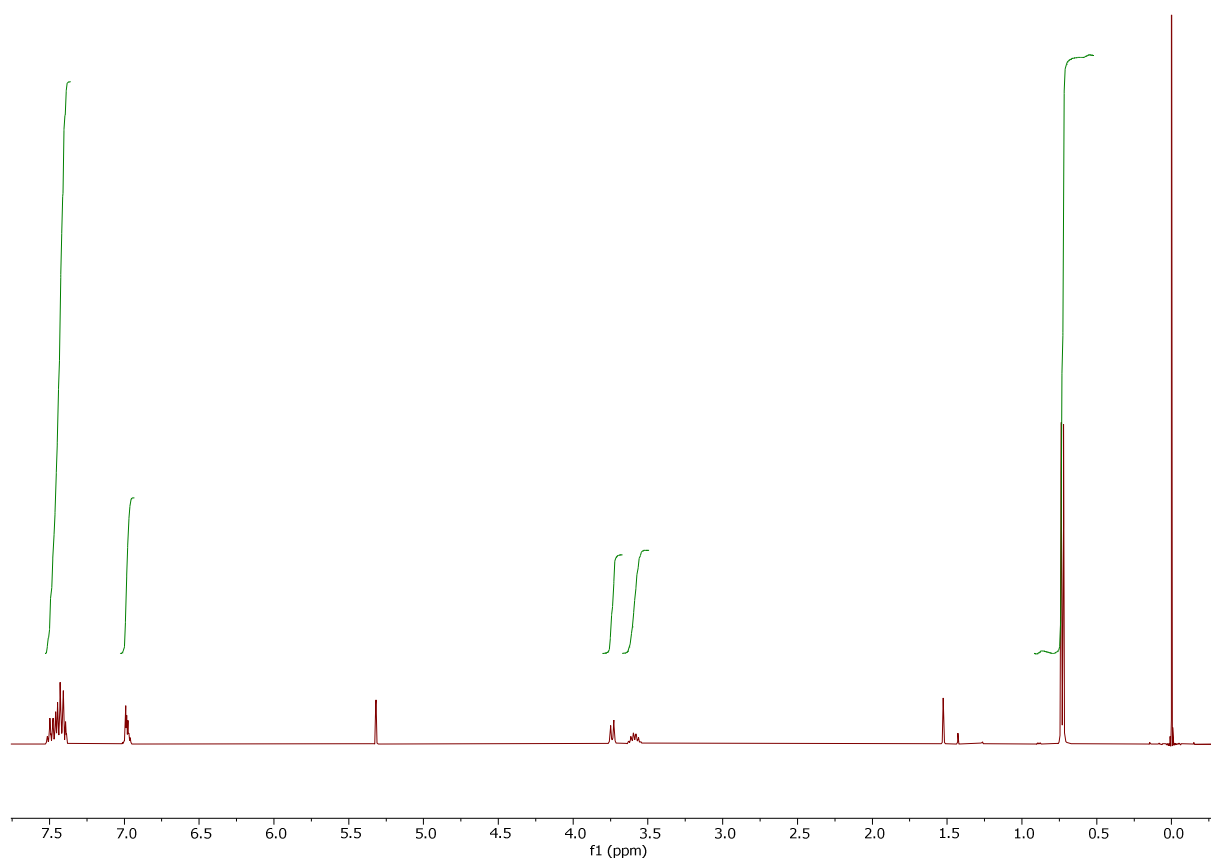

**Figure S19**  $^1\text{H}$  NMR spectrum ( $\text{CD}_2\text{Cl}_2$ , 400 MHz) of **3a**

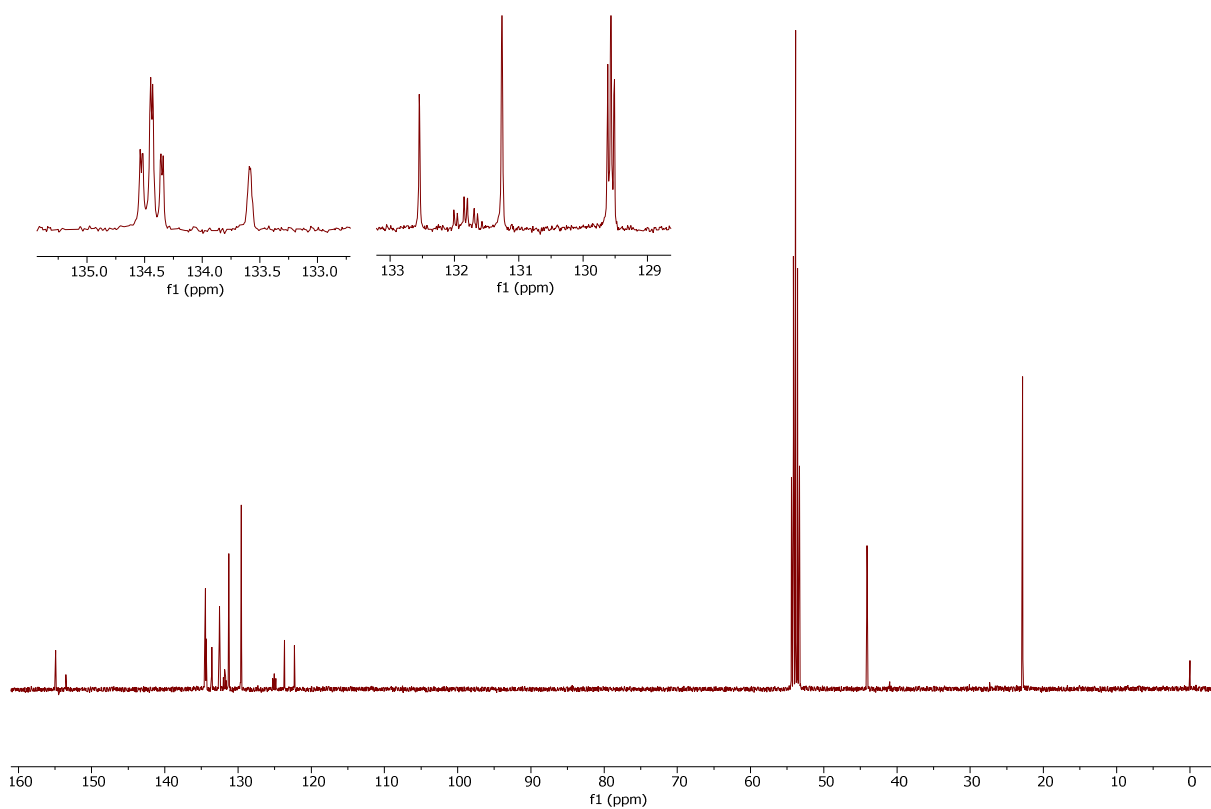

**Figure S20**  $^{13}\text{C}\{^1\text{H}\}$  NMR spectrum ( $\text{CD}_2\text{Cl}_2$ , 101 MHz) of **3a**

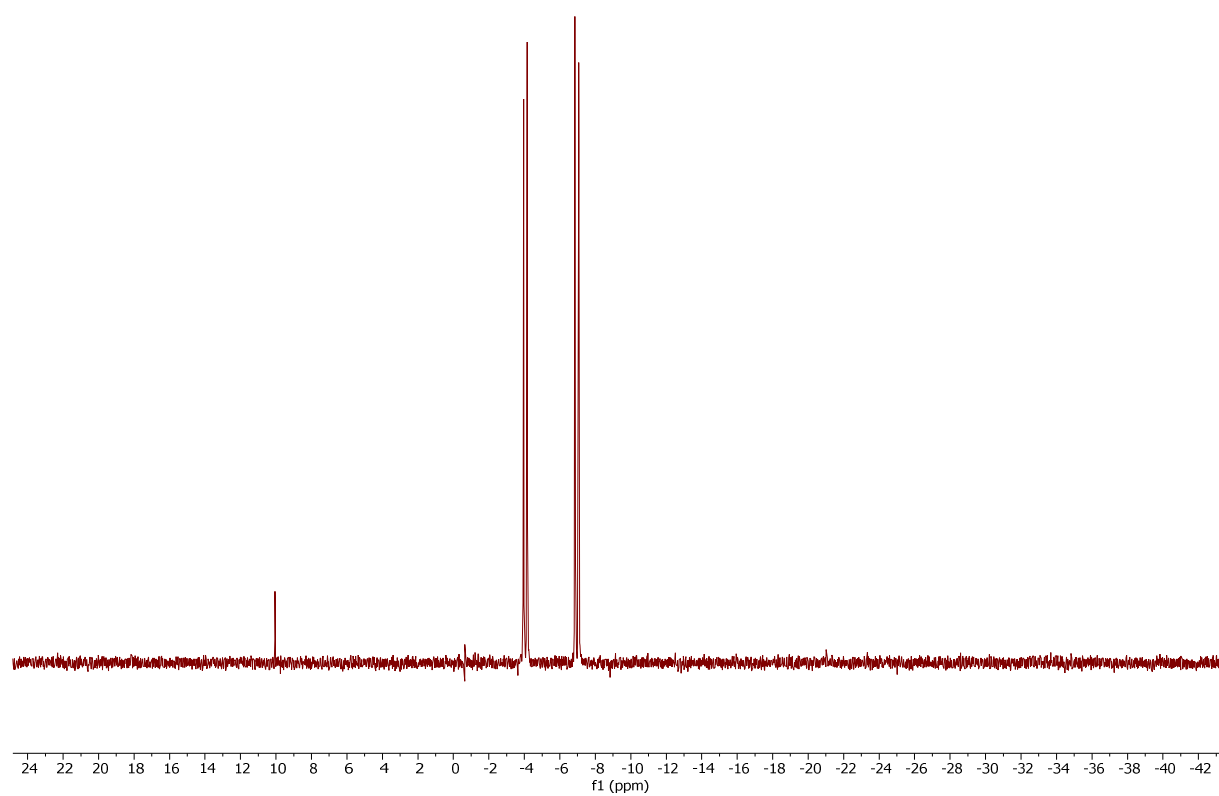

**Figure S21**  $^{31}\text{P}\{^1\text{H}\}$  NMR spectrum ( $\text{CD}_2\text{Cl}_2$ , 162 MHz) of **3a** (the “signal” at  $\delta_{\text{P}} \approx 10$  is a spike)



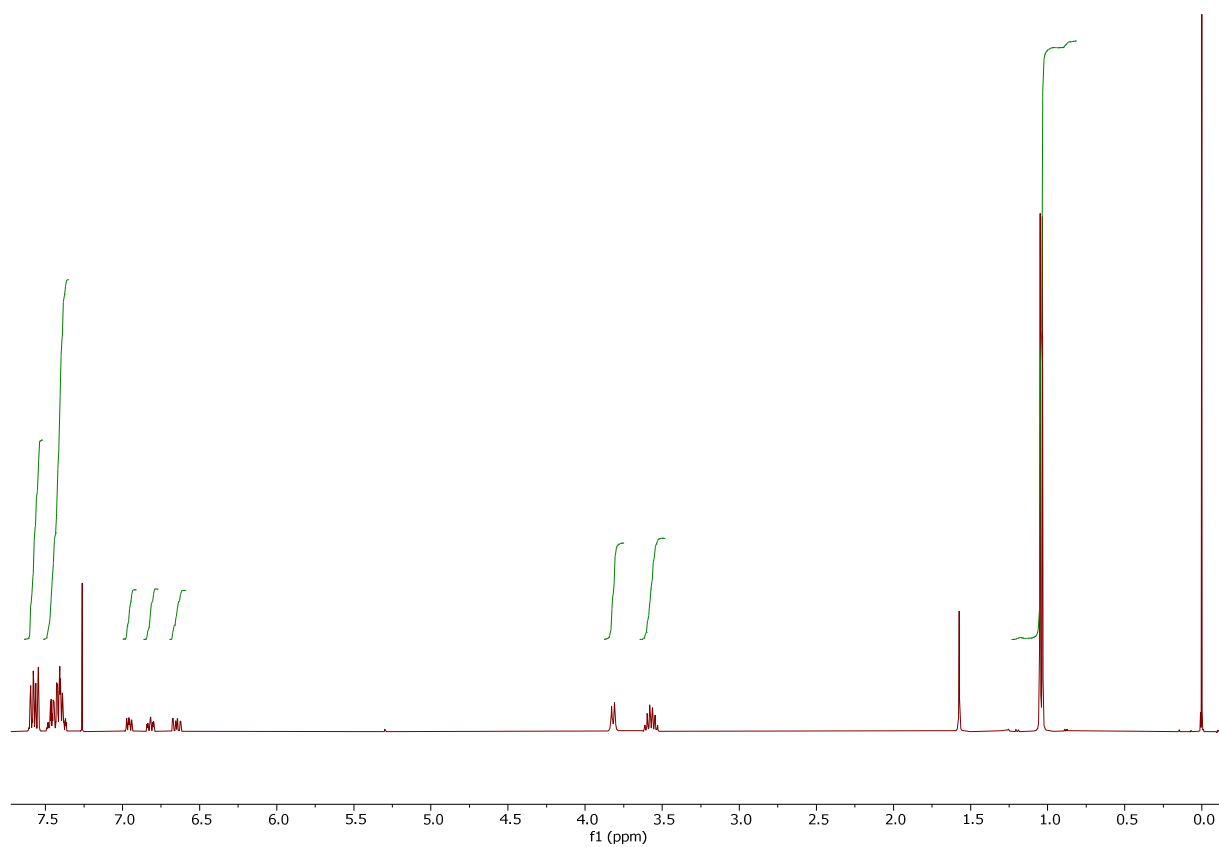

**Figure 22**  $^1\text{H}$  NMR spectrum ( $\text{CDCl}_3$ , 400 MHz) of **4**

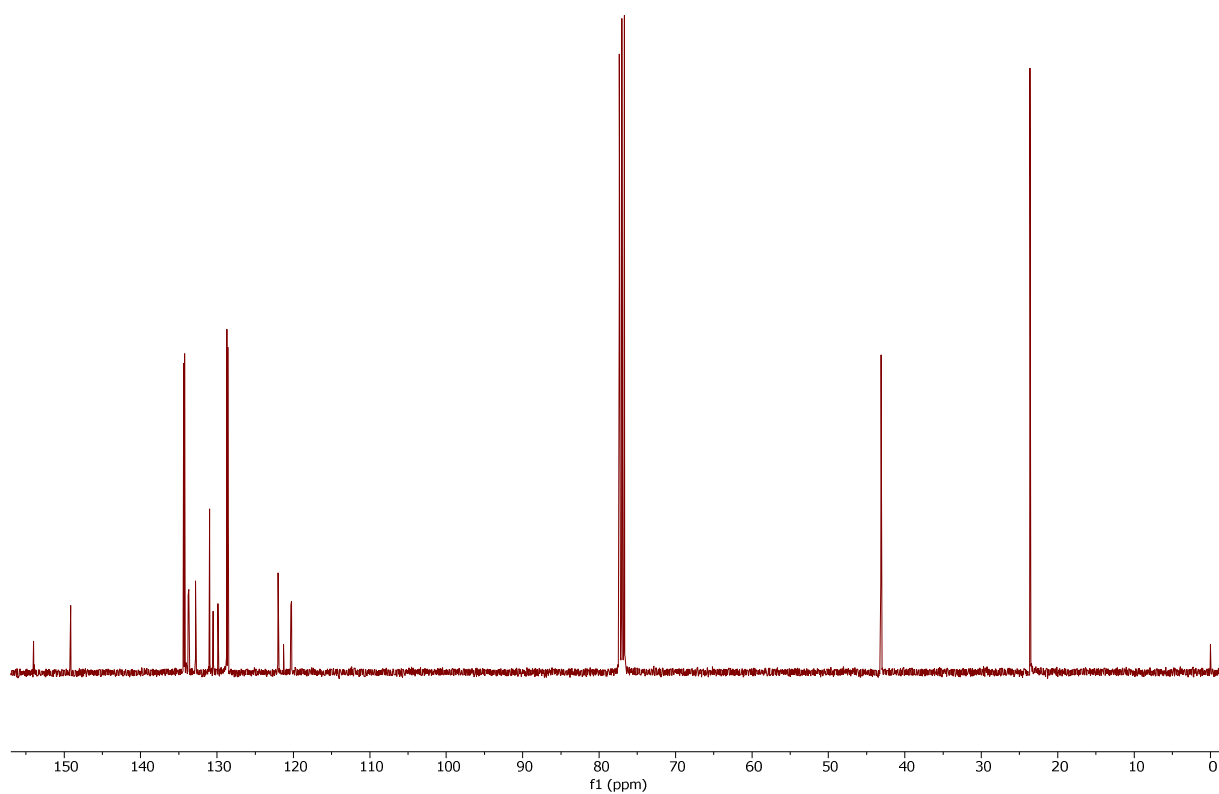

**Figure S23**  $^{13}\text{C}\{^1\text{H}\}$  NMR spectrum ( $\text{CDCl}_3$ , 101 MHz) of **4**

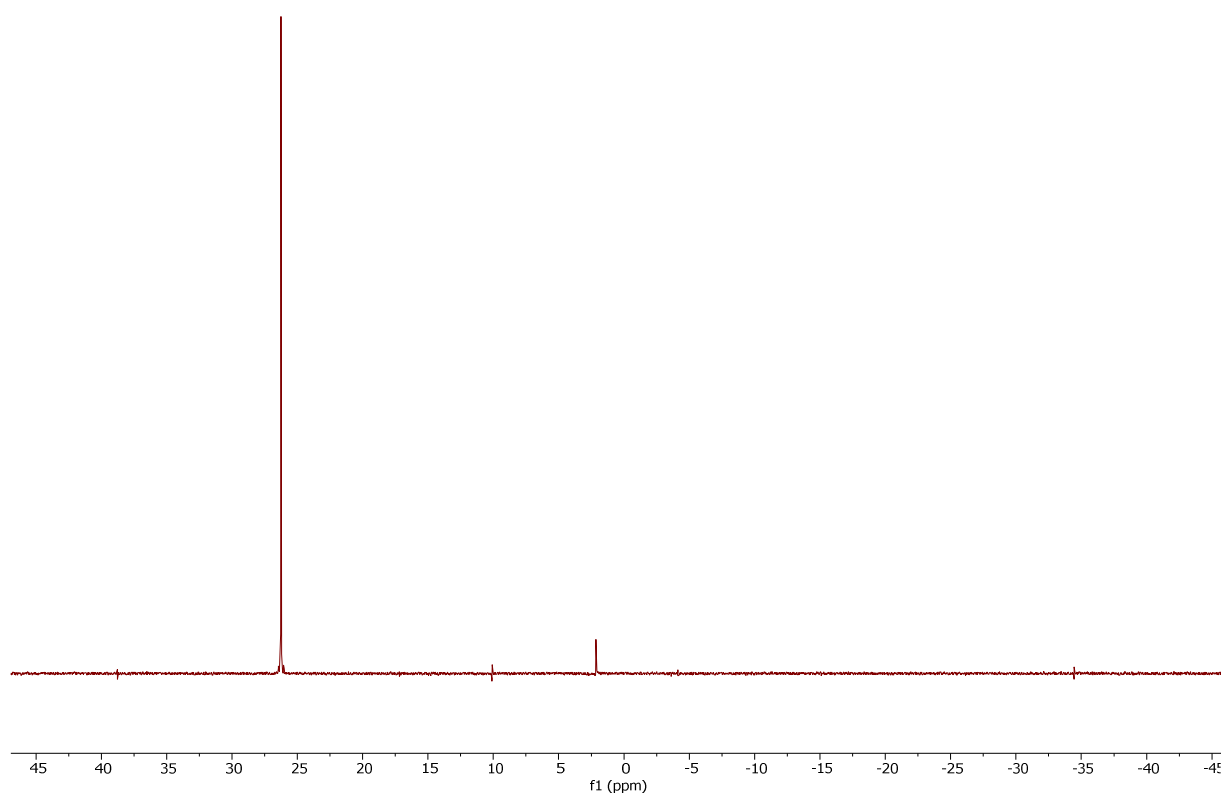

**Figure S24**  $^{31}\text{P}\{^1\text{H}\}$  NMR spectrum ( $\text{CDCl}_3$ , 162 MHz) of **4**

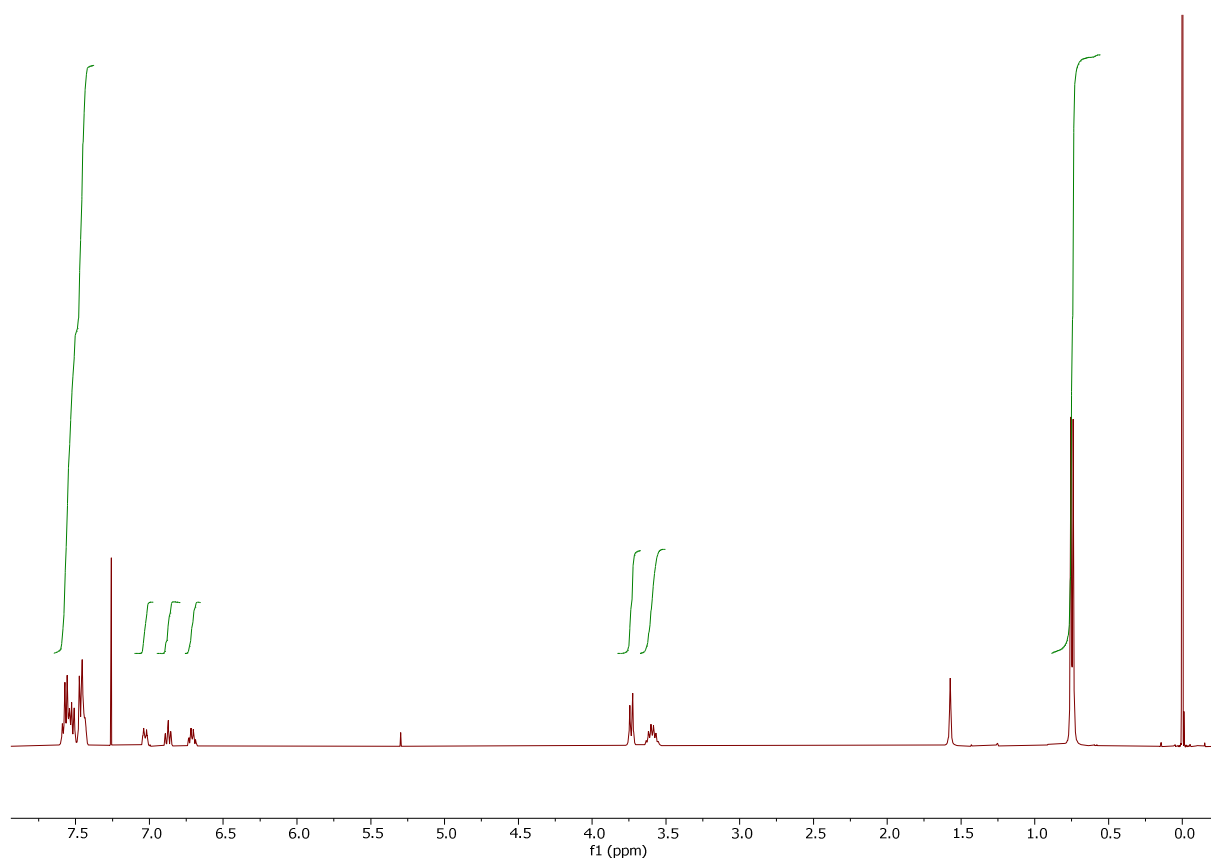

**Figure S25**  $^1\text{H}$  NMR spectrum ( $\text{CDCl}_3$ , 400 MHz) of **5**

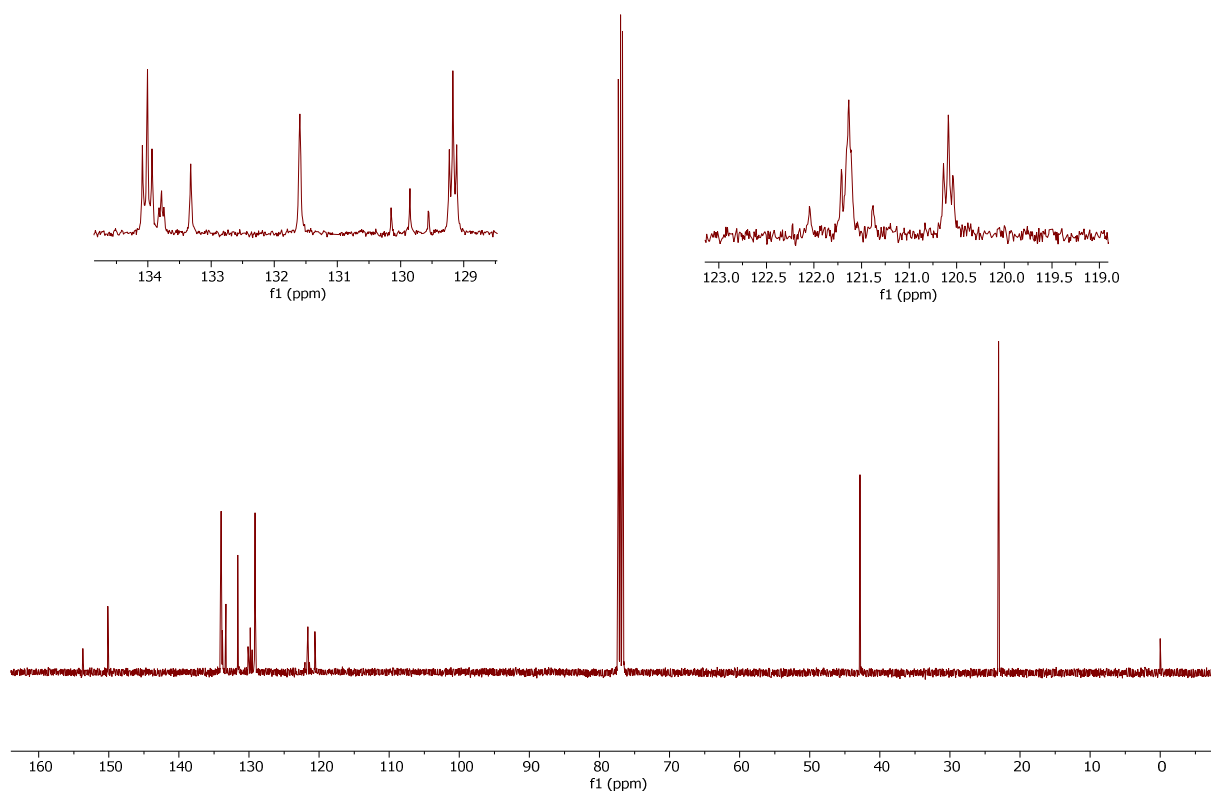

**Figure S26**  $^{13}\text{C}\{^1\text{H}\}$  NMR spectrum ( $\text{CDCl}_3$ , 101 MHz) of **5**

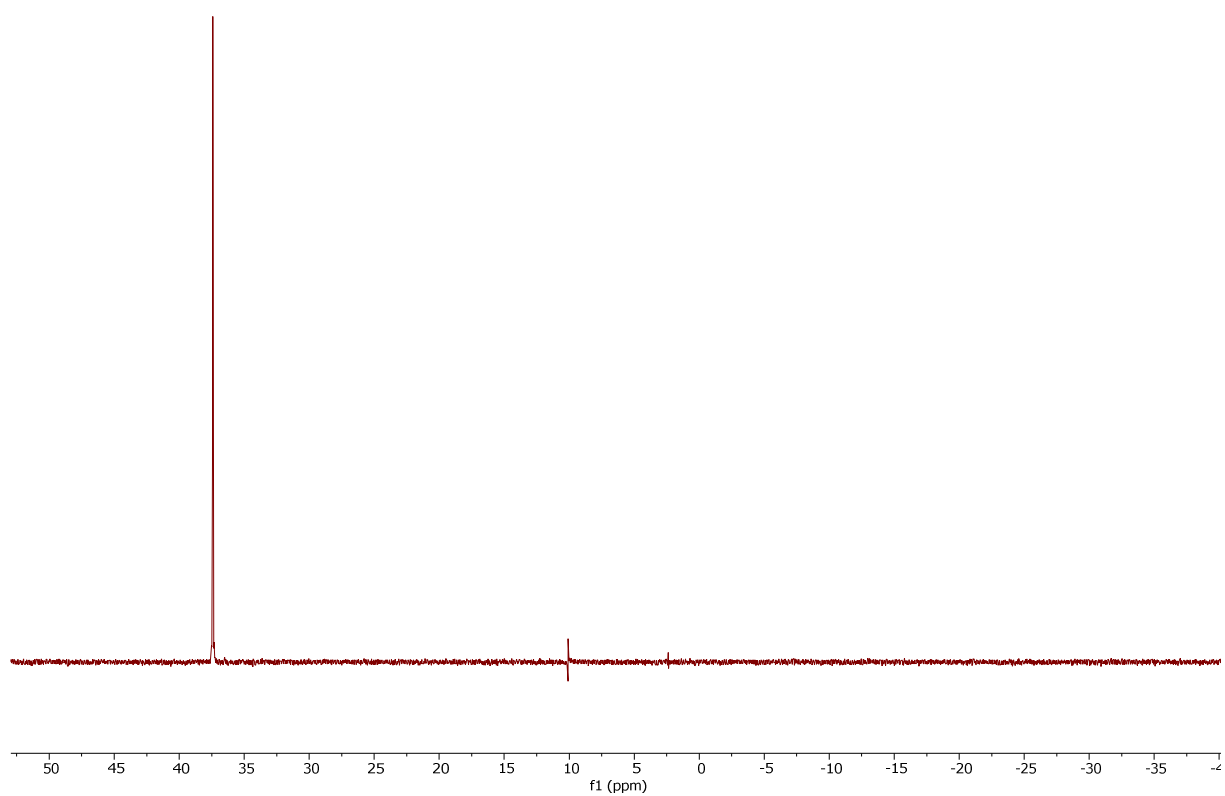

**Figure S27**  $^{31}\text{P}\{^1\text{H}\}$  NMR spectrum ( $\text{CDCl}_3$ , 162 MHz) of **5**

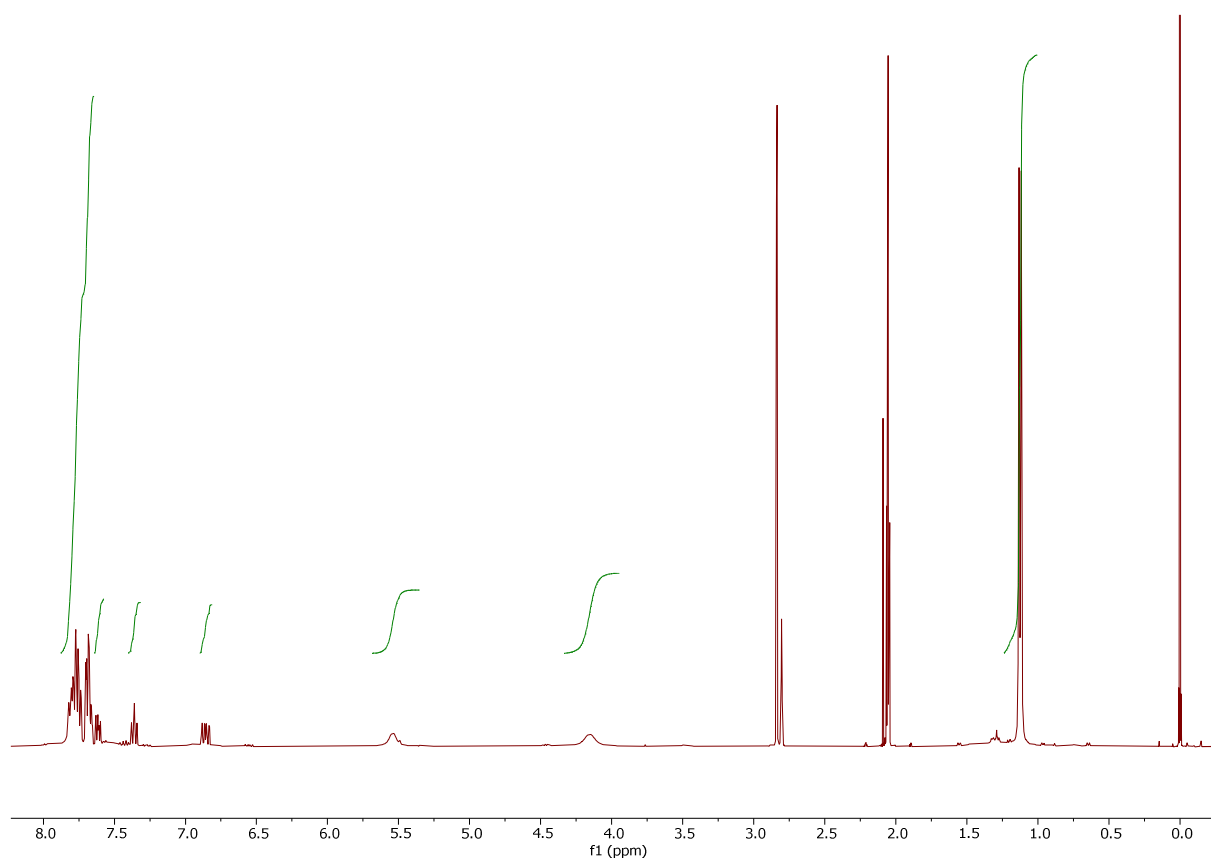

**Figure S28**  $^1\text{H}$  NMR spectrum (acetone- $\text{d}_6$ , 400 MHz) of **6**

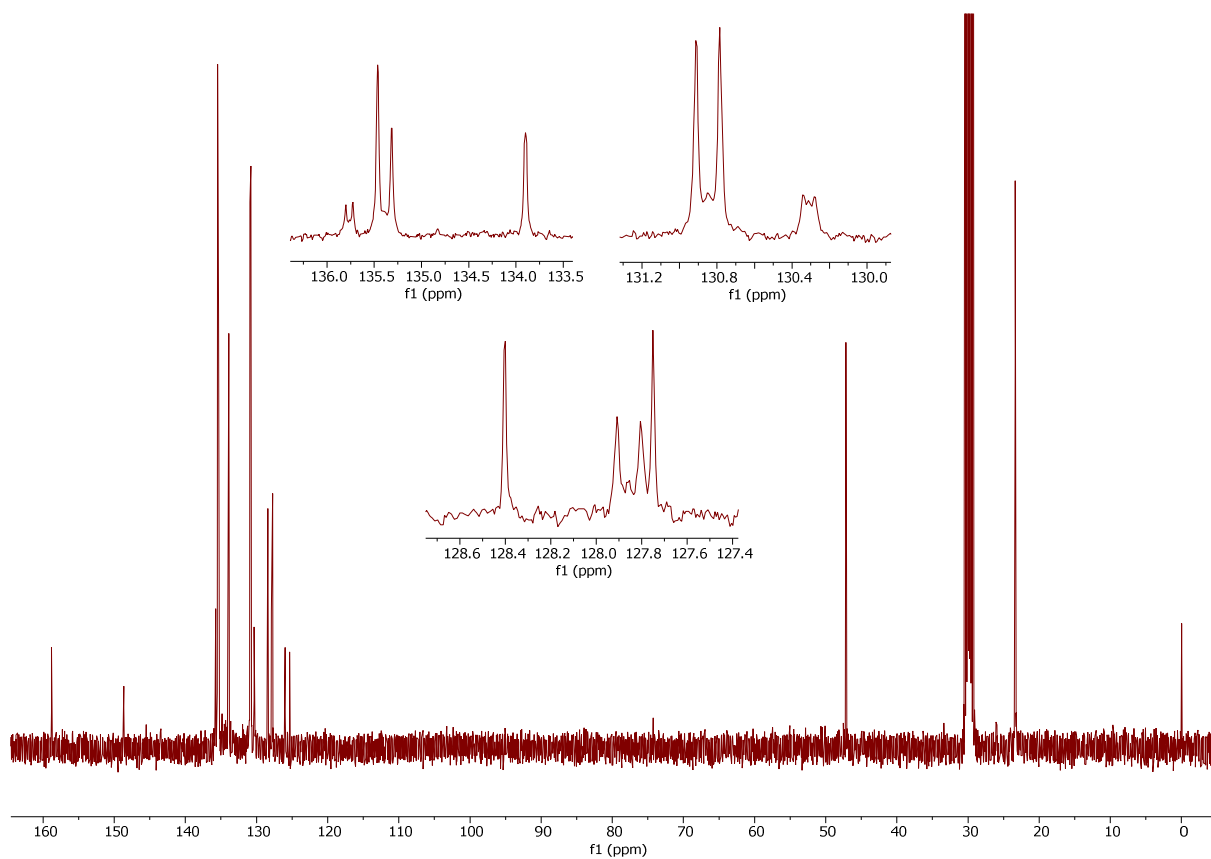

**Figure S29**  $^{13}\text{C}\{^1\text{H}\}$  NMR spectrum (acetone- $\text{d}_6$ , 101 MHz) of **6**

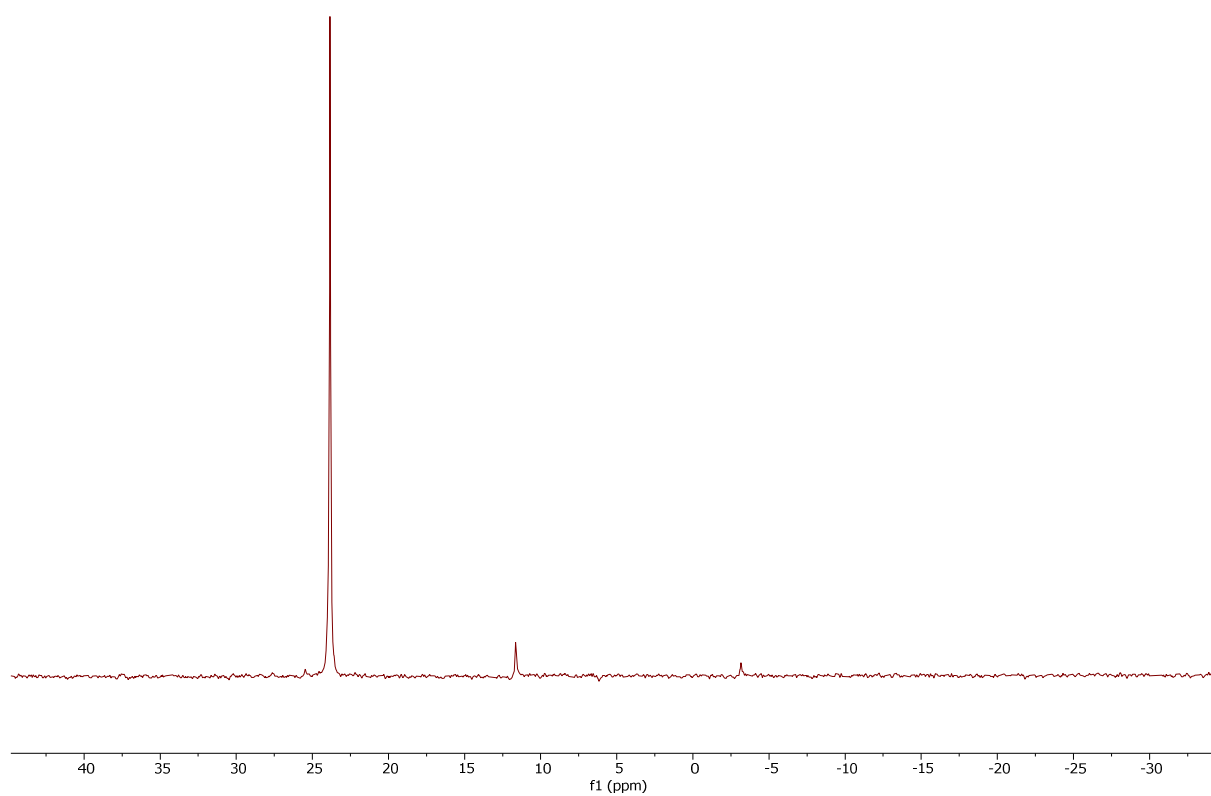

**Figure S30**  $^{31}\text{P}\{^1\text{H}\}$  NMR spectrum (acetone- $\text{d}_6$ , 162 MHz) of **6**

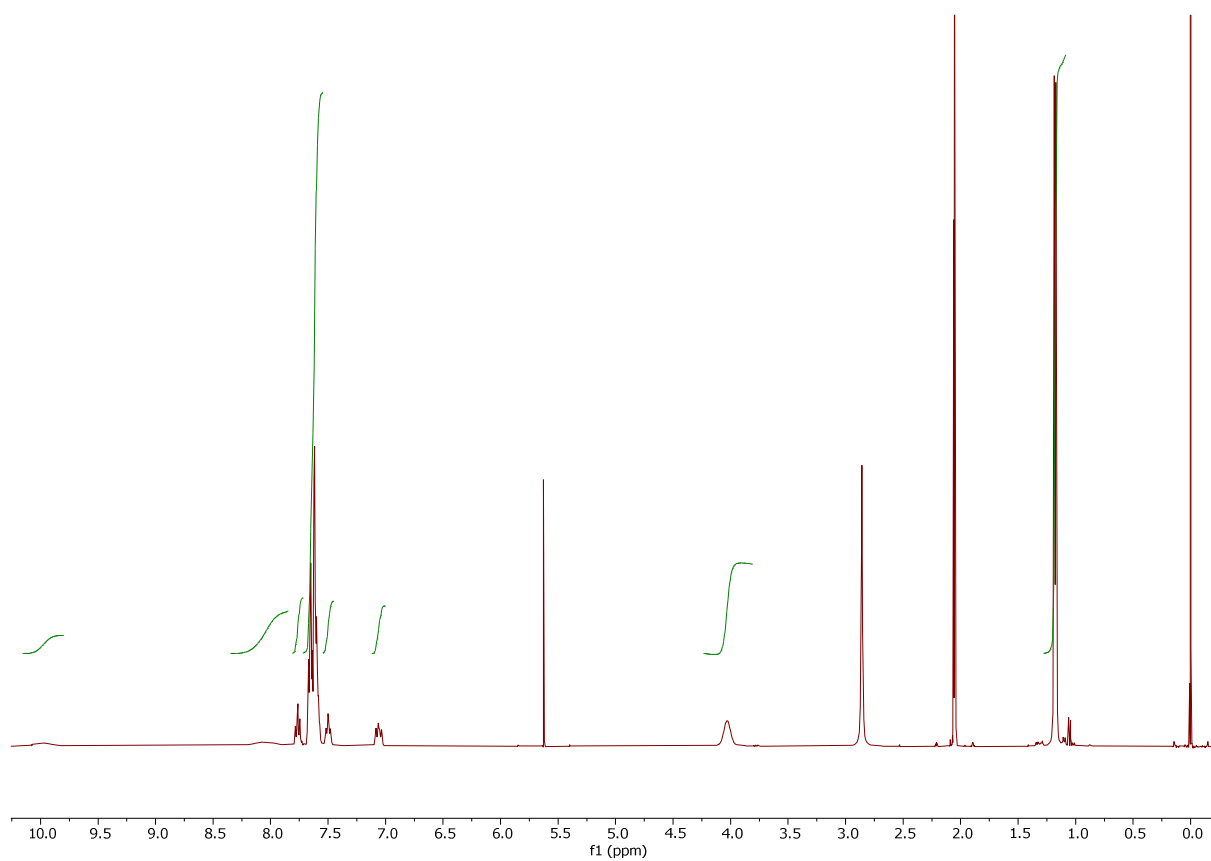

**Figure S31**  $^1\text{H}$  NMR spectrum (acetone- $\text{d}_6$ , 400 MHz) of **7a**

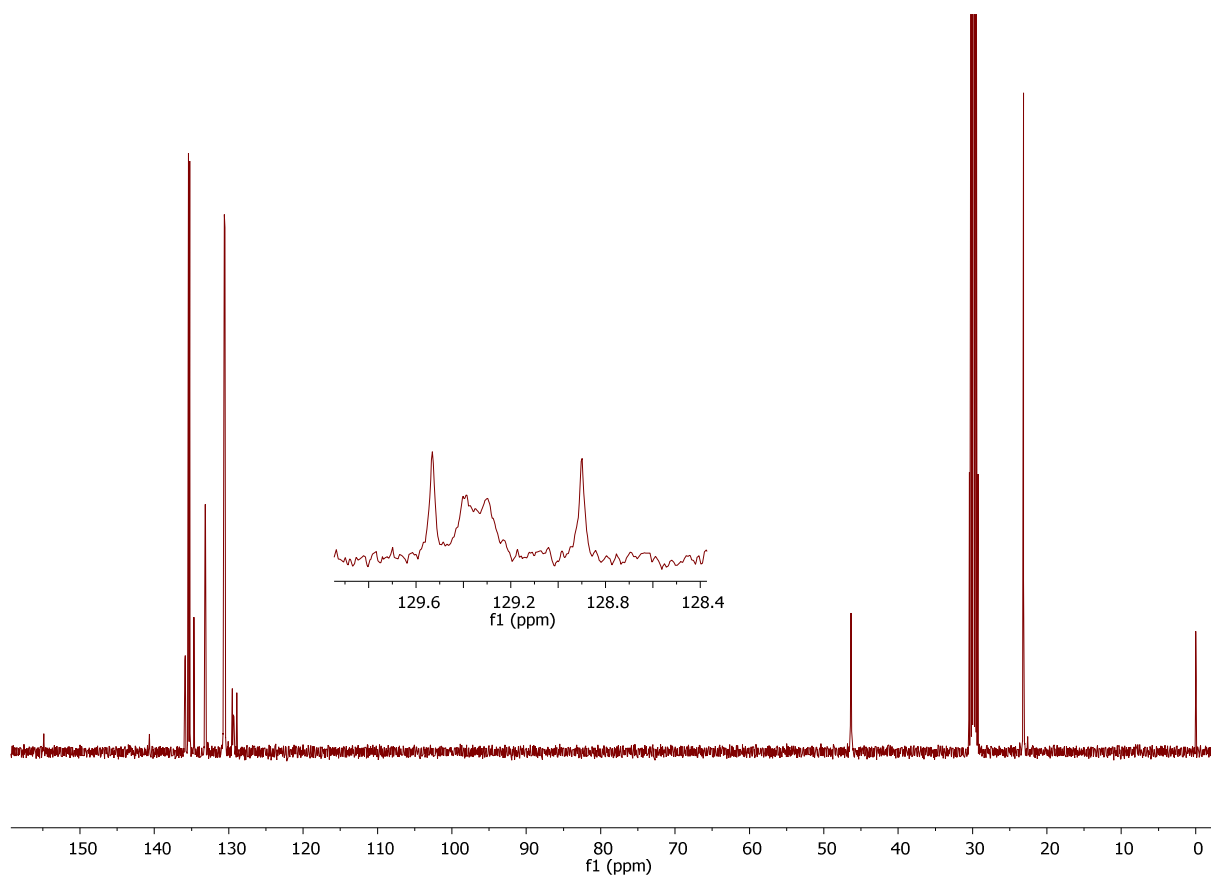

**Figure S32**  $^{13}\text{C}\{^1\text{H}\}$  NMR spectrum (acetone- $\text{d}_6$ , 101 MHz) of **7a**

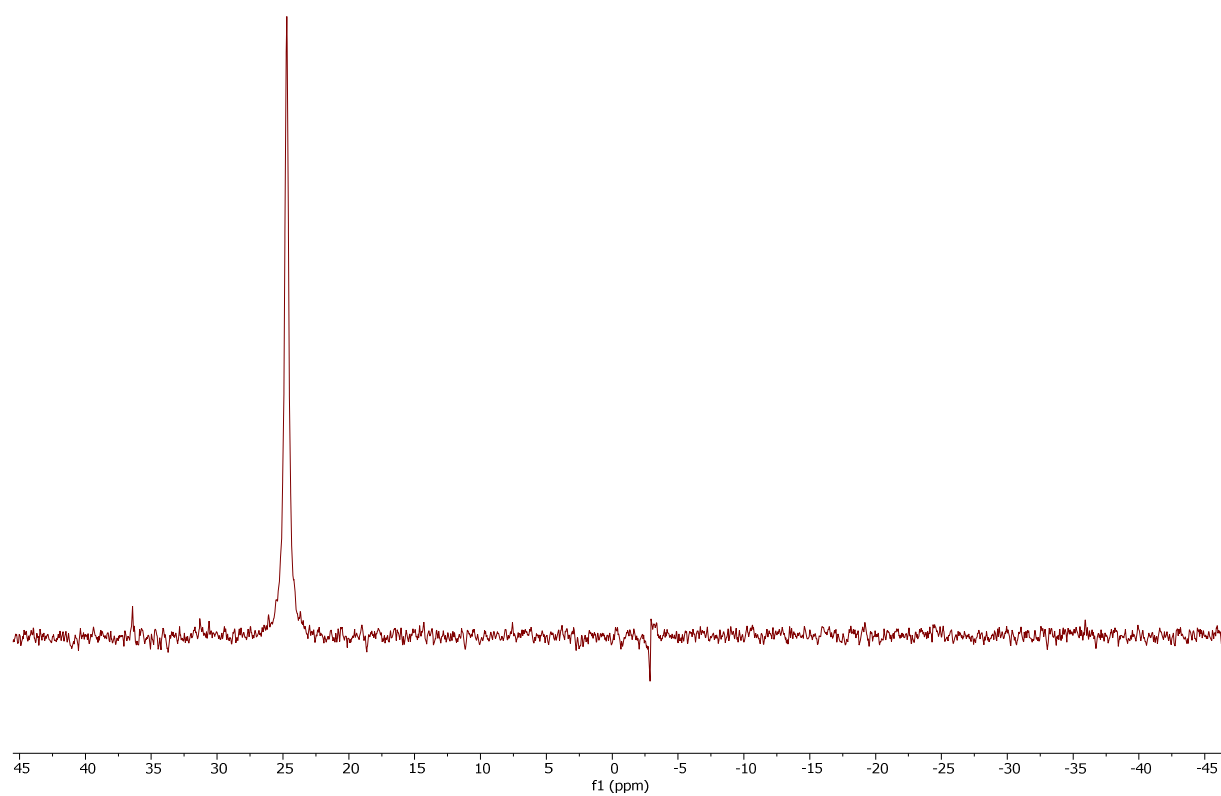

**Figure S33**  $^{31}\text{P}\{^1\text{H}\}$  NMR spectrum (acetone- $\text{d}_6$ , 162 MHz) of **7a**



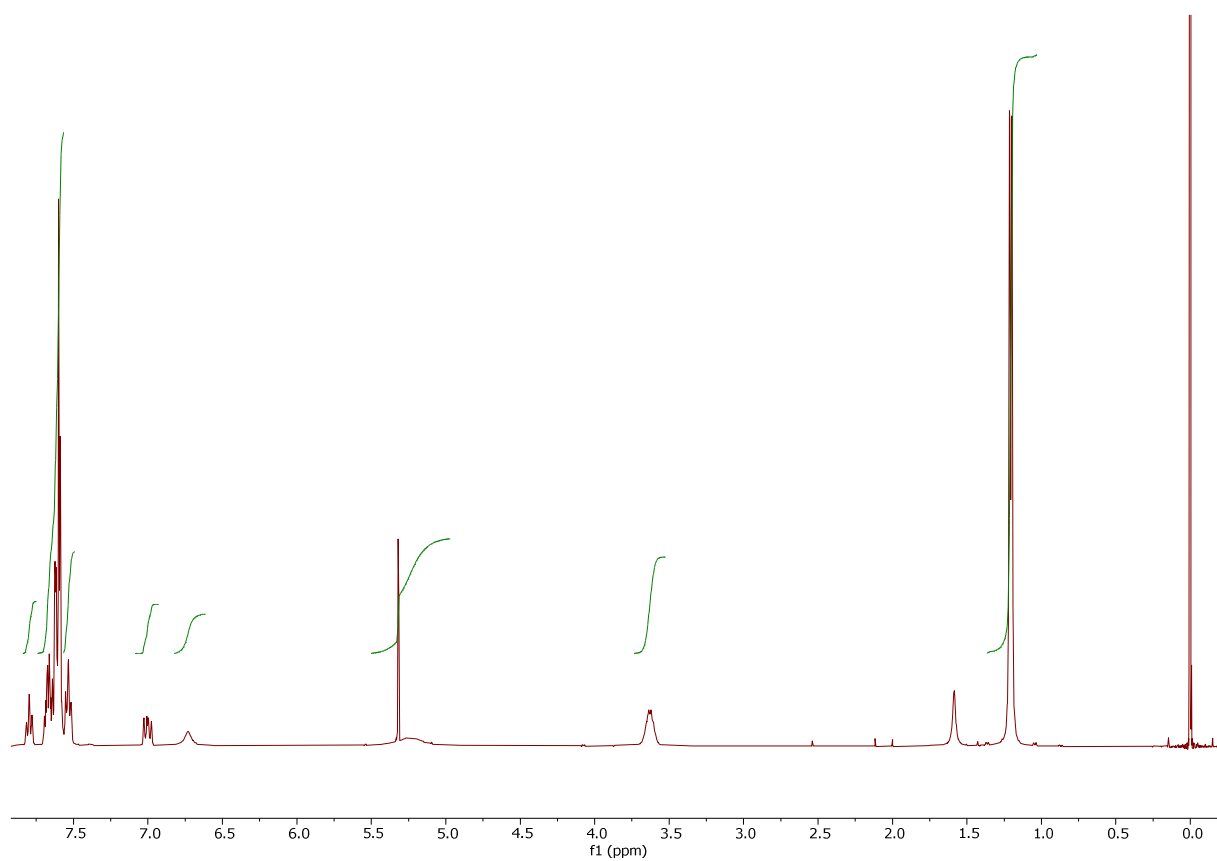

**Figure S34**  $^1\text{H}$  NMR spectrum ( $\text{CD}_2\text{Cl}_2$ , 400 MHz) of **7b**

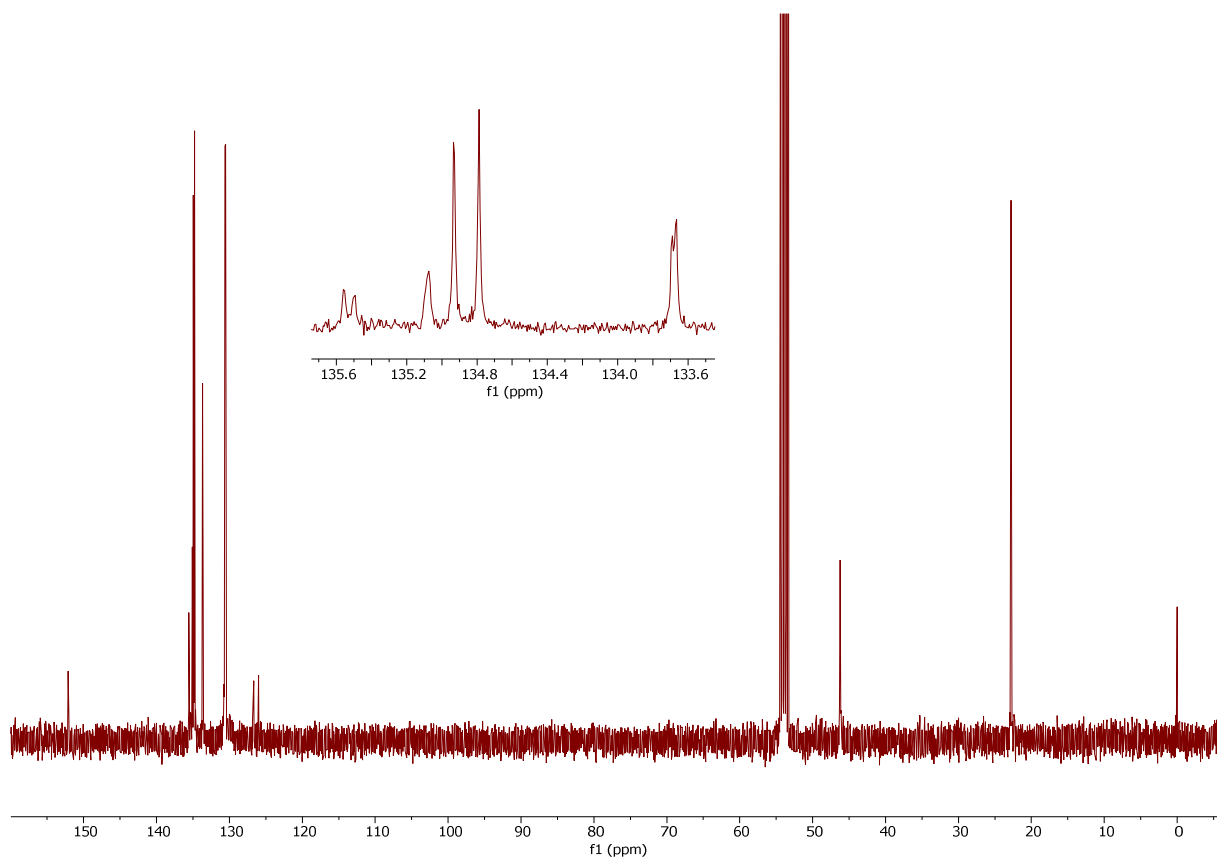

**Figure S35**  $^{13}\text{C}\{^1\text{H}\}$  NMR spectrum ( $\text{CD}_2\text{Cl}_2$ , 101 MHz) of **7b**

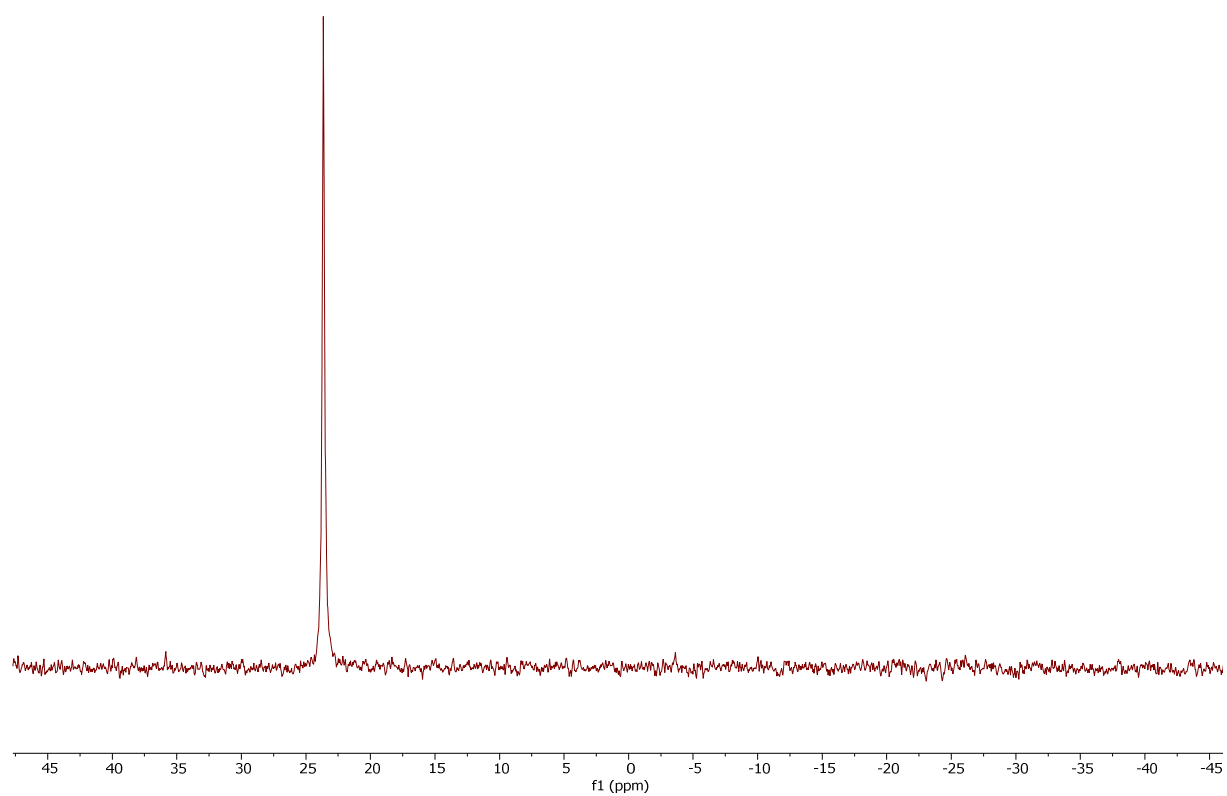

**Figure S36**  $^{31}\text{P}\{^1\text{H}\}$  NMR spectrum ( $\text{CD}_2\text{Cl}_2$ , 162 MHz) of **7b**
